Paganos *et al.*,

1       Single cell RNA sequencing of the *Strongylocentrotus purpuratus* larva  
2       reveals the blueprint of major cell types and nervous system of a non-  
3       chordate deuterostome

4  
5       Periklis Paganos<sup>1</sup>, Danila Voronov<sup>1</sup>, Jacob Musser<sup>2</sup>, Detlev Arendt<sup>2</sup> and Maria I. Arnone<sup>1\*</sup>

6  
7       <sup>1</sup>Stazione Zoologica Anton Dohrn, Department of Biology and Evolution of Marine Organisms,  
8       Villa Comunale, 80121, Naples, Italy

9       <sup>2</sup>European Molecular Biology Laboratory, Developmental Biology Unit, Meyerhofstrasse 1,  
10       69117 Heidelberg, Germany

11       \*corresponding author: [miarnone@szn.it](mailto:miarnone@szn.it)

12

13       **Abstract**

14       Identifying the molecular fingerprint of organismal cell types is key for understanding their  
15       function and evolution. Here, we use single cell RNA sequencing (scRNA-seq) to survey  
16       the cell types of the sea urchin early pluteus larva, representing an important  
17       developmental transition from non-feeding to feeding larva. We identified 21 distinct cell  
18       clusters, representing cells of the digestive, skeletal, immune, and nervous systems.  
19       Further subclustering of these revealed a highly detailed portrait of cell diversity across  
20       the larva, including the identification of 12 distinct neuronal cell types. Moreover, we  
21       corroborated co-expression of key regulatory genes previously shown to drive sea urchin  
22       gene regulatory networks, and revealed additional domains in which these regulatory  
23       networks are likely to function within the larva. Lastly, we recovered a neuronal cell type  
24       co-expressing *Pdx-1* and *Brn1/2/4*, which had previously been shown to share similar  
25       gene expression with vertebrate pancreas. Our results extend this finding, revealing  
26       twenty transcription factors shared by this population of neurons in sea urchin and  
27       vertebrate pancreatic cells. Using differential expression results from *Pdx-1* knockdown  
28       experiments, we generate a draft of the *Pdx-1* regulatory network in these cells, and  
29       hypothesize this network was present in an ancestral deuterostome neuron before being  
30       co-opted into the pancreas developmental lineage in vertebrates.

31

32       **Introduction**

33       Multicellular organisms consist of numerous cell types, specialized in performing different  
34       tasks that guide all aspects of their growth and survival. During embryonic development,  
35       cells go through rounds of proliferation, specification and differentiation into cell types with  
36       distinct function. The information for this developmental diversification lies in the genome  
37       and the spatio-temporal expression of regulatory genes that specifies the molecular  
38       fingerprint of a given cell type (Fu et al., 2017).

Paganos *et al.*,

39 The identity of each cell type is established, controlled and maintained by distinct Gene  
40 Regulatory Networks (GRNs). GRNs are logical maps of the regulatory inputs and outputs  
41 active in a cell at a given place and time, and are enacted by transcription factors,  
42 signaling molecules and terminal differentiation genes (Davidson *et al.*, 2003, Davidson  
43 and Erwin, 2006). GRNs have been studied in a variety of organisms ranging from plants  
44 to animals in order to analyze the gene interactions at a specific time and place during  
45 the life of an organism (Krouk *et al.*, 2013), and have been used for understanding the  
46 relationship between genome and development (Davidson and Erwin, 2006). Therefore,  
47 understanding the genetic mechanisms that provide cell types with a specific identity, and  
48 the conservation of this identity across animal taxa, is essential for understanding cell  
49 type function and evolutionary history (Arendt, 2008, Arnone *et al.*, 2016).

50 Until recently, most approaches for comparing cell types relied on the identification of  
51 molecular markers, perturbation of gene expression and fate mapping. However,  
52 technological advances in microfluidics and nucleic acid barcoding now allow the high-  
53 through-put recognition of an organism's cell types at a single cell level. In particular,  
54 single cell RNA sequencing (scRNA-seq) technology, developed during the last decade,  
55 is a powerful method used to unravel the transcriptional content of individual cells,  
56 resulting in the identification of distinct cell types in an unbiased manner (Tang *et al.*,  
57 2009, Klein *et al.*, 2015). ScRNA-seq involves dissociation of an organism, organ or tissue  
58 into single cells, isolation and capture of the single cells into droplets, specific barcoding  
59 of individual mRNAs, and sequencing of transcriptomic content of each cell.  
60 Computational analysis can then identify putative cell types by clustering cells with similar  
61 transcriptional profiles.

62 Echinoderms are a member of the phylogenetic sister group to deuterostomes, making  
63 them an ideal model for understanding the origin and diversification of deuterostome and  
64 chordate cell types. Sea urchin embryos and larvae have also been extensively used to  
65 unravel the general mechanisms of cell type specification and differentiation during  
66 development (Cameron and Davidson, 1991, Davidson *et al.*, 1998, McClay, 2011, Lyons  
67 *et al.*, 2012, McClay *et al.*, 2020). The main reason for this lays in the ease with which  
68 different cell types and biological processes can be observed in the optically transparent  
69 embryos and larvae. Among the most well-studied sea urchin cell types are those  
70 comprising the nervous (Bisgrove and Burke, 1987, Burke *et al.*, 2006a, McClay *et al.*,  
71 2018), immune (Rast *et al.*, 2006, Ho *et al.*, 2017) and digestive systems (Annunziata *et al.*,  
72 2014, Annunziata and Arnone, 2014, Perillo and Arnone, 2014, Perillo *et al.*, 2016),  
73 and of both musculature (Andrikou *et al.*, 2013, Andrikou *et al.*, 2015) and skeleton  
74 (Okazaki, 1965, Duloquin *et al.*, 2007, Rafiq *et al.*, 2012, Sun and Ettensohn, 2017). For  
75 these, the developmental origins and gene regulatory wiring has been described in great  
76 detail, making the sea urchin an ideal model for GRN comparative analyses in  
77 development and evolution (Cary *et al.*, 2020).

78 Here we take advantage of the detailed characterization of the sea urchin cell types  
79 performed over the years, the available cell type specific molecular markers, and the ease  
80 with which the sea urchin larvae are dissociated into single cells, to perform scRNA-seq  
81 and generate a comprehensive atlas of sea urchin larval cell types. Our findings suggest  
82 that the larva consists of 21 genetically-distinct cell clusters, each representing a distinct  
83 cell type or set of closely related subtypes (Shekhar and Menon, 2019), which we validate

Paganos *et al.*,

84 using fluorescent *in situ* hybridization (FISH) and immunohistochemistry (IHC). Based on  
85 previous studies tracing developmental lineage, we assigned cell types to specific germ  
86 layers, revealing that most transcription factors are expressed pleiotropically in cells  
87 derived from multiple germ layers, yet tend to be cell type-specific within a germ layer. In  
88 addition, we illustrate how single-cell data can help corroborate previously studied GRNs,  
89 and also reveal novel cellular domains where these GRNs are likely also activated. Lastly,  
90 we investigate neuronal diversity in the sea urchin larva, identifying 12 distinct neuronal  
91 cell types. Notably, we also recovered a unique neurosecretory type that expressed *Sp-*  
92 *Pdx1* and *Sp-Brn1/2/4*, which had been described previously as exhibiting a pancreatic-  
93 like gene expression signature (Perillo *et al.*, 2018). Our results confirm and extend this  
94 pancreatic-like signature, suggesting that an ancestral neuron in early deuterostomes  
95 may have given rise to the endocrine cells in the vertebrate pancreas. Supporting this,  
96 knockdown of *Sp-Pdx1* shows it is necessary for differentiation of this pancreatic-like  
97 neuronal endocrine population, indicating it has an evolutionary conserved role as a  
98 mediator of endocrine fate.

99

## 100 **Results**

### 101 **Building a cell type atlas of the sea urchin larva with single-cell transcriptomics**

102 Sea urchin early pluteus larvae were cultured and collected at 3 dpf. We performed single-  
103 cell RNA sequencing on six samples from four independent biological replicates.  
104 Individual samples were dissociated into single cells using a gentle enzyme-free  
105 dissociation protocol and using the 10x Chromium scRNA-seq system (Figure 1A). In  
106 total, transcriptomes from 19,699 cells were included in the final analysis. To identify sea  
107 urchin larval cell types, we used Louvain graph clustering as implemented in the Seurat  
108 pipeline (see methods). This revealed 21 genetically-distinct cell clusters (Figure 1B,  
109 supplement 1A and B), each representing an individual cell type or set of closely related  
110 cell types in the early pluteus larva.

111 Next, we set out to explore the identity of our initial 21 cell clusters. We first assigned  
112 preliminary identities to each cluster based on the expression of previously described cell  
113 type markers: ciliary band (*Btub2*) (Harlow and Nemer, 1987), apical plate (*Hbn*) (Burke  
114 *et al.*, 2006a), aboral ectoderm (*Spec2a*) (Yuh *et al.*, 2001), lower oral ectoderm (*Bra*)  
115 (Wei *et al.*, 2012), upper oral ectoderm (*Gsc*) (Wei *et al.*, 2012), neurons (*SynB*) (Burke  
116 *et al.*, 2006a), esophageal muscles (*Mhc*) (Andrikou *et al.*, 2013), coelomic pouches  
117 (*Nan2*) (Juliano *et al.*, 2010), blastocoelar cells (185/333) (Ho *et al.*, 2017), immune cells  
118 (*Gcm*) (Materna *et al.*, 2013), skeleton (*Msp130*) (Harkey *et al.*, 1992), anus (*Hox11/13b*),  
119 intestine (*Cdx*), pyloric sphincter (*Pdx-1*), different stomach domains (*Chp*, *ManrC1a*,  
120 *Endo16*) (Annunziata and Arnone, 2014), exocrine pancreas-like domain (*Ptf1a*) (Perillo  
121 *et al.*, 2016), cardiac sphincter (*Trop1*) (Yaguchi *et al.*, 2017) and esophagus (*Brn1/2/4*)  
122 (Cole and Arnone, 2009). Further, we grouped putative cell types according to embryonic  
123 germ layer origin (Figure 1C) using knowledge from previous lineage tracing experiments  
124 (Angerer and Davidson, 1984, Cameron *et al.*, 1987).

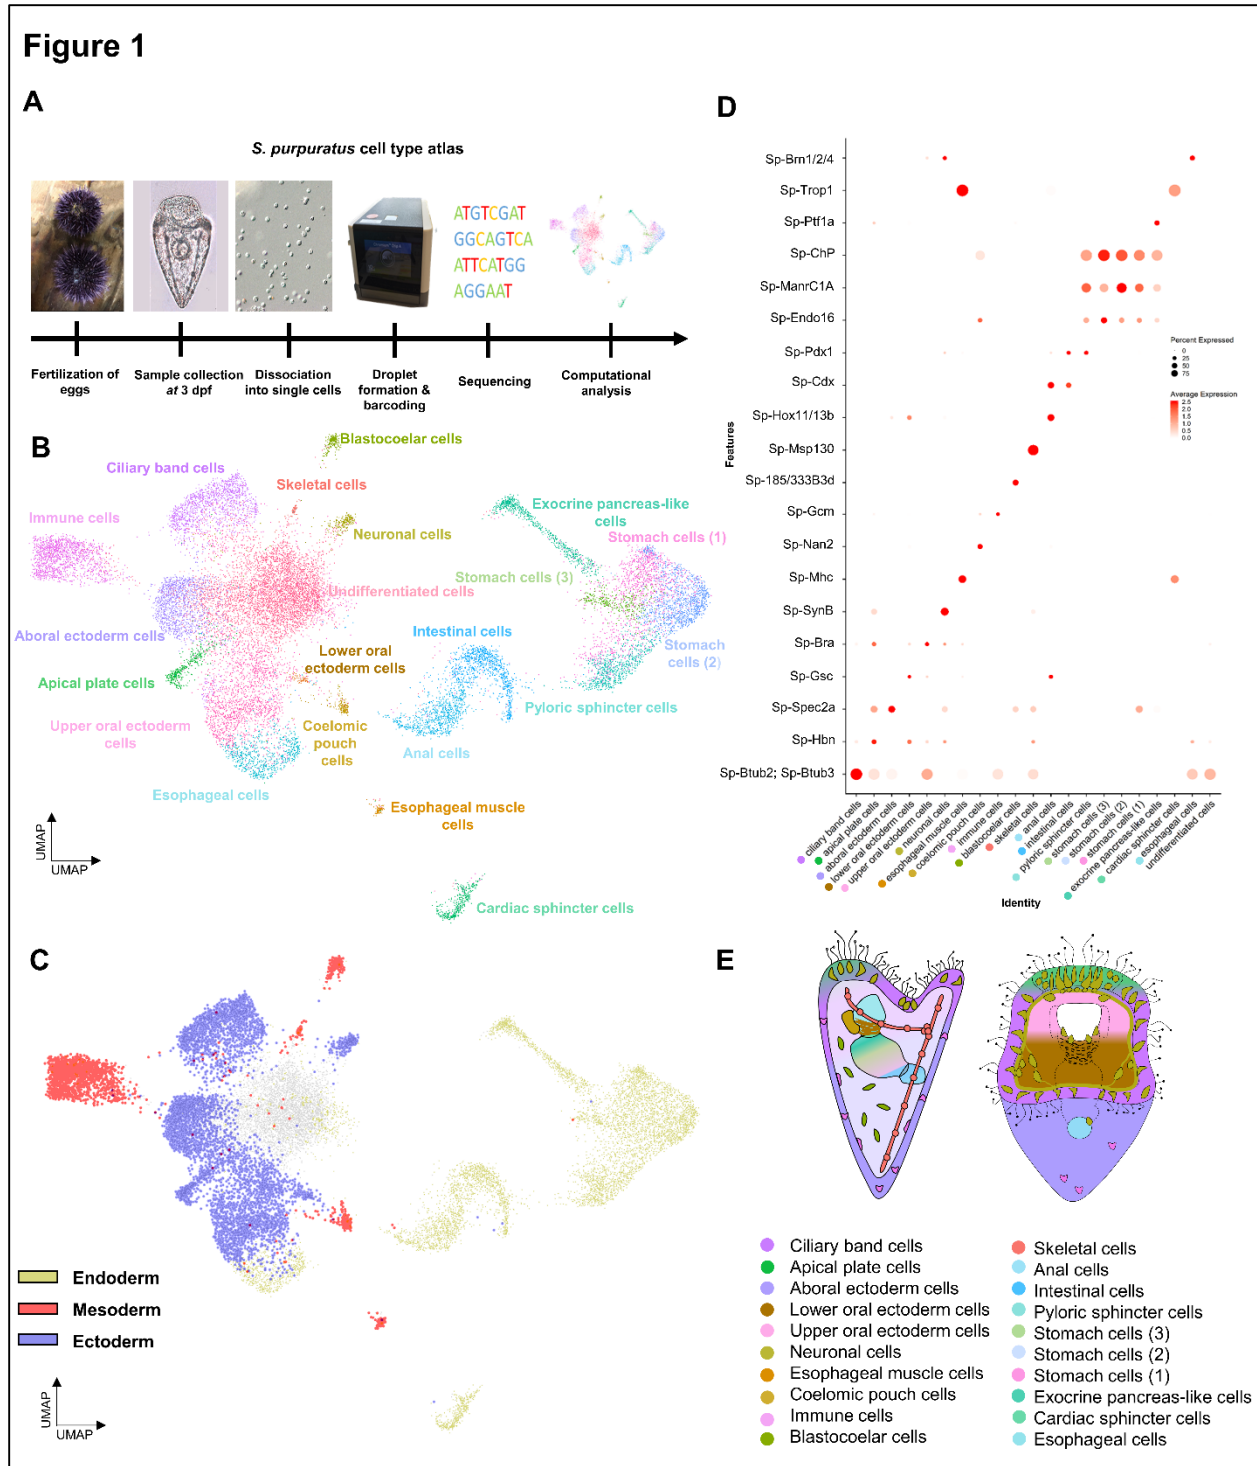

125

126 **Figure 1. Cell type atlas of the 3 dpf *S. purpuratus* larva. A)** Single-cell RNA sequencing  
 127 pipeline from gamete fertilization to computational analysis. **B)** UMAP showing 3 dpf larval cells  
 128 colored by their assignment to initial set of 21 distinct cell clusters. **C)** UMAP with cells colored by  
 129 germ layer they are derived from: Endoderm (yellow), mesoderm (red), and ectoderm (blue). **D)**  
 130 Dotplot of gene markers specific to cell clusters. **E)** Illustration depicting location of cell types on  
 131 different larval domains. Color-code is the same as in Figure 1B.

Paganos *et al.*,

132 To validate these identities, we identified all genes expressed in each cell type, totaling  
133 15,578 genes, and performed *in situ* hybridization on a selected set of these together in  
134 combination with previously described markers. Based on this, we mapped 20 of the 21  
135 clusters to distinct larval domains and confirmed their identity (Figure 1E). Notably, the  
136 resulting expression patterns validated the initial predictions (Figure 2- Figure supplement  
137 2), verifying the high quality nature of the single-cell dataset. Importantly, this approach  
138 also confirmed new markers for each cell type, including *Sp-FbsL\_2* (ciliary band; Figure  
139 2A1), *Sp-hypp\_2386* (skeletal cells; Figure 2A9), and *Sp-Serp2/3* (exocrine pancreas-like  
140 cells; Figure 2A14). The 21st cluster, which had a poorly-defined molecular signature  
141 and lacked specific localization, likely represents undifferentiated cells (Figure 1- Figure  
142 Supplement 1C-E).

143 Our scRNA-seq analysis and *in situ* hybridization protocol also allowed us to identify novel  
144 expression domains for several previously described cell type markers. For instance, the  
145 transcription factors *Sp-SoxC* and *Sp-Hbn*, previously described in early neuronal  
146 specification (Garner *et al.*, 2016, Wei *et al.*, 2016, Yaguchi *et al.*, 2016), were predicted  
147 by our scRNA-seq analysis to also be expressed in skeletal cells (Figure 2B & 2C1-3,  
148 2C4-6). Confirming this, we found *Sp-Hbn* expressed in skeletal cells using *In situ*  
149 hybridization with immunostaining of PMCs along the skeletal rods (Harkey *et al.*, 1992)  
150 (Figure 2- Figure supplement 3). Likewise, the FGF signaling ligand, *Sp-Fgf9/16/20*, is  
151 known to be involved in skeletal formation and is expressed in specific populations of  
152 PMCs (Adomako-Ankomah and Etensohn, 2014). ScRNA-seq indicates it is also  
153 expressed in oral ectoderm, cardiac sphincter, intestine and anus (Figure 2B & 2C7-9).

154 Lastly, we compared the limits of detection by *in situ* hybridization versus single cell RNA  
155 sequencing, using the coelomic pouch cell cluster as a case study. The coelomic pouch  
156 is derived from the mesoderm and gives rise to the rudiment and juvenile sea urchin after  
157 metamorphosis (Strathmann, 1987, Smith *et al.*, 2008). The formation of the coelomic  
158 pouch is complex, and includes contributions from the small micromeres, a mesodermal  
159 cell population that is set aside during early development (Pehrson and Cohen, 1986,  
160 Strathmann, 1987). In an attempt to characterize this population, a study by Juliano *et*  
161 *al.* analyzed the expression of genes involved in germ line determination and  
162 maintenance in a variety of organisms. While some well known germ line specific  
163 transcripts and proteins were found exclusively expressed in the small micromeres and  
164 the coelomic pouch of the sea urchin embryo (Juliano *et al.*, 2006), the majority of the  
165 genes tested by *in situ* hybridization were not enriched in this cell type. Interestingly,  
166 plotting the Juliano and coauthors' gene list alongside to previously described coelomic  
167 pouch specific genes (Luo and Su, 2012, Martik and McClay, 2015) we found all  
168 candidates to be enriched in the same cell cluster (Figure 2- Figure supplement 3)  
169 suggesting the higher detection sensitivity of single cell RNA sequencing compared to the  
170 *in situ* hybridization as well as adding crucial missing information on the molecular  
171 fingerprint of such a complex cell type.

Paganos *et al.*,

**Figure 2**

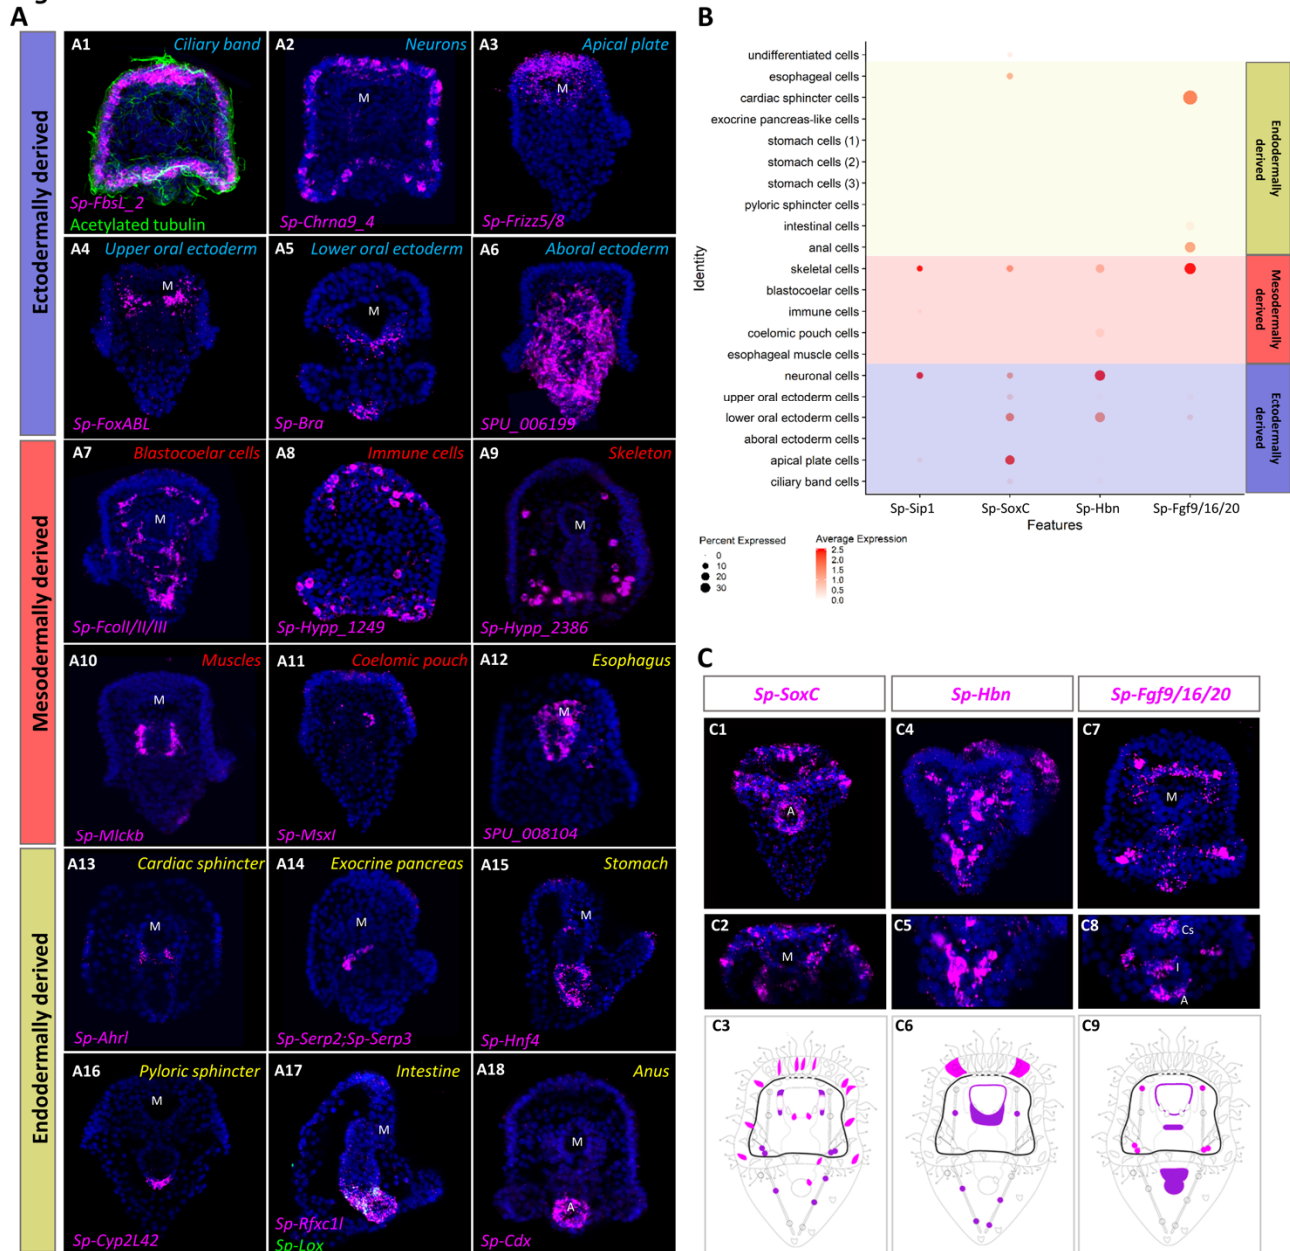

172

173 **Figure 2. Validation of scRNA-seq predictions and novel expression domains.**

174 **A**) FISH of *S. purpuratus* 3 dpf larvae with antisense probes for *Sp-FbsL\_2* (A1), *Sp-Chrna9\_4*

175 (A2), *Sp-Frizz5/8* (A3), *Sp-FoxABL* (A4), *Sp-Bra* (A5), *SPU\_006199* (A6), *Sp-Fcoll/II/III* (A7), *Sp-*

176 *Hypp\_1249* (A8), *Sp-Hypp\_2386* (A9), *Sp-Mlckb* (A10), *Sp-Msxl* (A11), *SPU\_008104* (A12), *Sp-*

177 *Ahrl* (A13), *Sp-Serp2; Sp-Serp3* (A14), *Sp-Hnf4* (A15), *Sp-Cyp2L42* (A16), *Sp-Rfxc1l* (A17), *Sp-*

178 *Pdx1* (A17) and *Sp-Cdx* (A18). Color-code indicates germ layer embryonic origin: endoderm

179 (yellow), mesoderm (red), ectoderm (blue). Immunofluorescent detection of acetylated tubulin in

180 ciliary band (green). **B**) Dotplot of *Sp-Sip1*, *Sp-SoxC*, *Sp-Hbn* and *Sp-Fgf9/16/20* expression

181 showing previously described and novel expression domains. **C**) FISH of *S. purpuratus* 3 dpf

182 larvae with antisense probes for *Sp-SoxC* (C1-C2), *Sp-Hbn* (C4-C5) and *Sp-Fgf9/16/20* (C7-C8).

183 Illustrations depicting all expression domains of *Sp-SoxC* (C3), *Sp-Hbn* (C6) and *Sp-Fgf9/16/20*

184 (C9); previously described expression domains are in magenta, newly identified ones are in

Paganos *et al.*,

185 purple. Nuclei are labelled with DAPI (in blue). All images are stacks of merged confocal Z  
186 sections. A, Anus; Cs, Ca rdiac sphincter; M, Mouth; I, Intestine; Ps, Pyloric sphincter; St,  
187 Stomach.

188 Lastly, to determine which cells in the larva were undergoing active proliferation, we  
189 plotted expression of cell division markers in sea urchin, including *pcna*, DNA  
190 polymerases, DNA ligases, condensins, and centromere proteins (Perillo *et al.*, 2020).  
191 The majority of cell proliferation genes were found to be enriched in the ciliary band, apical  
192 plate, coelomic pouch, immune and skeletal cell clusters (Figure 2- Figure supplement  
193 4A). We also observed Cdk genes enriched in several endodermally derived cell types  
194 (Figure 2-Supplement 4A). Validating this, we observed S-phase cells in endodermal and  
195 skeletal cells using Edu pulse labelling (Figure 2- Figure supplement 4B). In contrast, we  
196 did not observe Edu fluorescence in cell clusters that lacked expression of proliferation  
197 markers, such as aboral ectoderm.

### 198 **Identifying the different regulatory states of the larval cell types**

199 Transcription factors, and their cooperative interactions, play a critical role in establishing  
200 and maintaining cell type identity. In order to unravel the regulatory states of early larval  
201 cell types, we performed a comparison of the transcription factors expressed in early  
202 larval cell types. First, we observed that expression programs of cell types derived from  
203 the same germ layer tend to share greater similarity with each other compared with cell  
204 types derived from other germ layers (Figure 3- Figure supplement 1). This is consistent  
205 with the finding that cell type expression programs often retain information about their  
206 developmental lineage (Sladitschek *et al.*, 2020). Based on this, we initially compared  
207 transcription factor expression by germ layer of origin, artificially merging clusters by germ  
208 layer and excluding the cluster of undifferentiated cells. This revealed that few  
209 transcription factors are specific to cells derived from a single germ layer. Rather, a  
210 majority of regulators are expressed in derivatives of more than one germ layer (Figure  
211 3A), and nearly one third ( $n = 187$ ) are shared by cell types derived from of all three layers.  
212 Notably, mesodermal cell types share expression of more transcription factors with  
213 ectodermal than endodermal cell types, with which they are closely linked in development.  
214 Depending on the comparison, cell types derived from the same germ layer may share a  
215 great amount of TFs (1/3 in most cases), although in most comparisons the majority of  
216 transcription factors are cell type-specific in a given comparison (Figure 3B, 3D & 3E). In  
217 general, neighboring cell types and those with common developmental origins share a  
218 larger number of TFs (Figure 3D), compared to cell types with different developmental  
219 histories, such as skeletal and pyloric sphincter cells, which share only seven transcription  
220 factors in common (Figure 3C).

**Figure 4**

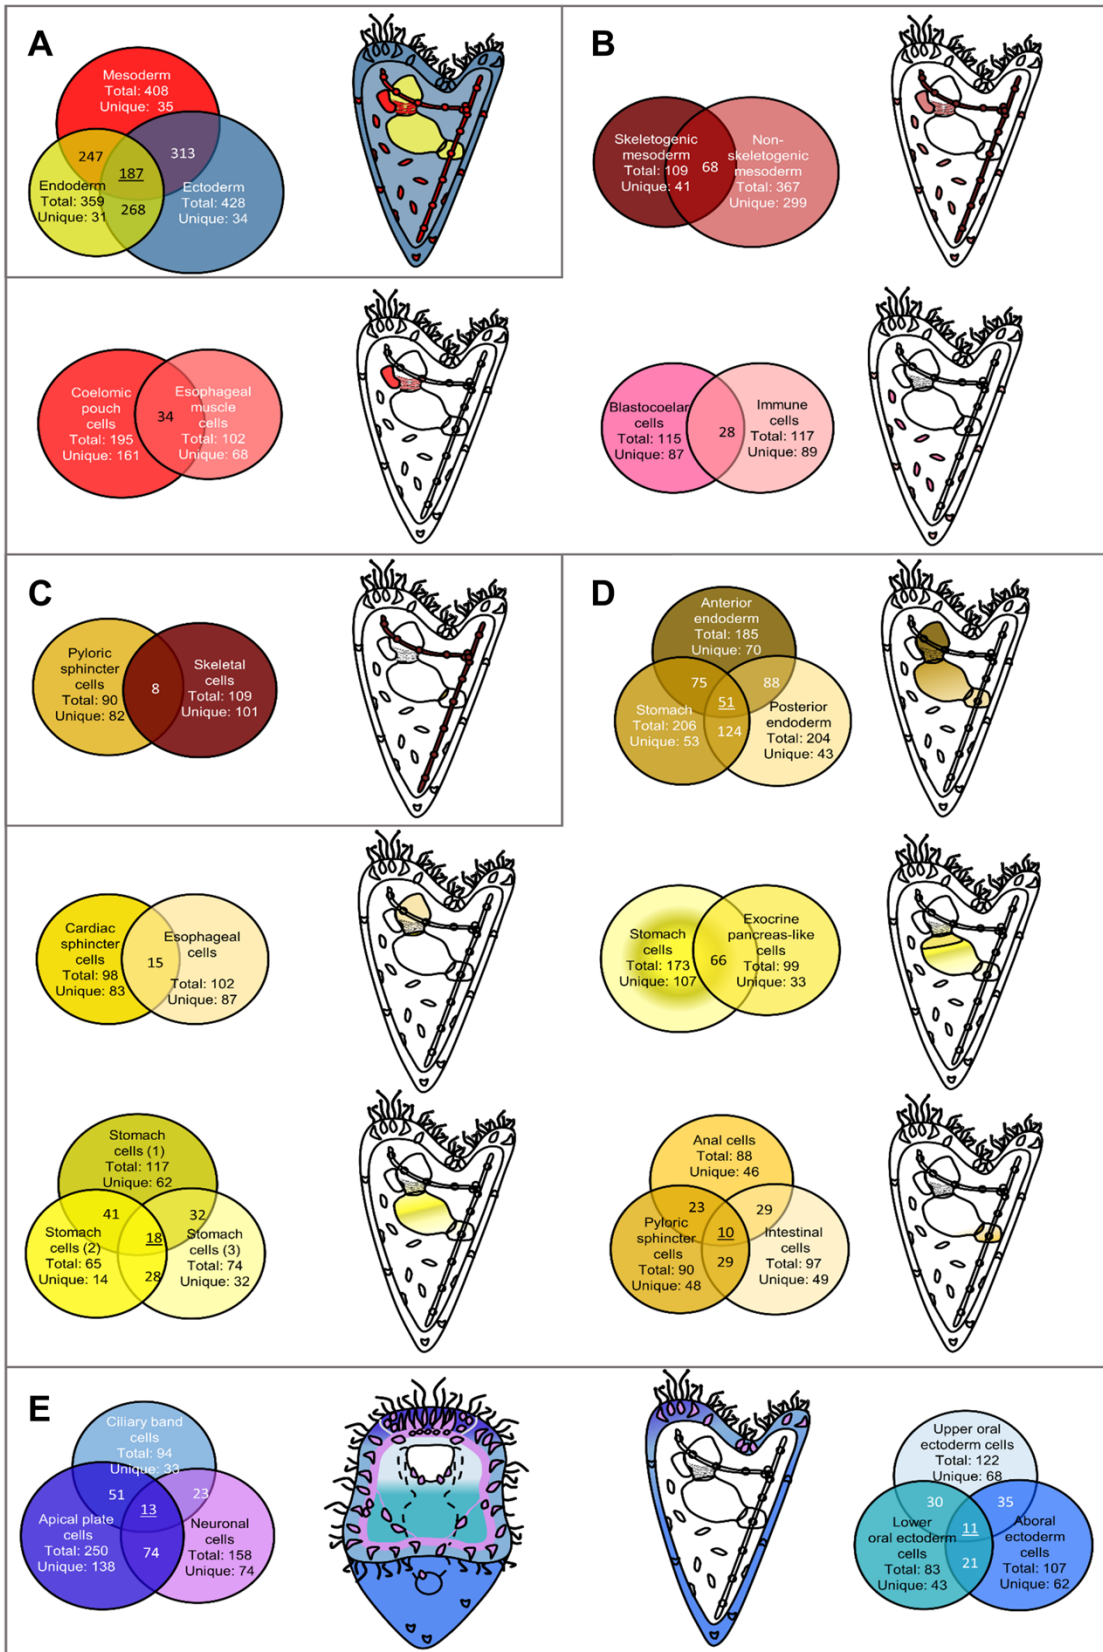



Paganos *et al.*,

222 **Figure 3. Regulatory states of the 3 dpf *S. purpuratus* larva. A)** Comparison of the  
223 transcription factor content per germ layer. Venn diagram showing the shared and unique  
224 transcription factors per germ layer. Ectodermally derived cell types are shown in blue,  
225 mesodermally derived in red, and endodermally derived in yellow. **B)** Comparison of the  
226 transcription factor content across mesodermal lineages and cell types. Venn diagram showing  
227 the shared and unique transcription factors per comparison. **C)** Transcription factor content  
228 comparison of pyloric sphincter (endodermally derived) and skeletal cells (mesodermally derived),  
229 used as a negative control of our comparison. **D)** Comparison of the transcription factor content  
230 per endodermal lineage and endodermally derived cell types. Venn diagram showing the shared  
231 and unique transcription factors per comparison. **E)** TF signature comparison of ectodermally  
232 derived cell types. Venn diagram showing the shared and unique transcription factors per  
233 comparison. Cartoons indicated the relative position of each cell type/lineage. Mesodermal cell  
234 types/lineages are shown in shades of red, endodermal ones in shades of yellow and endodermal  
235 ones in shades of blue.

236 To further characterize the regulatory profile of larval cell types we set out to identify the  
237 expression domains of members of major TF families (Figure 4 and Figure 4 supplement  
238 1). The *S. purpuratus* Homeobox transcription factors were first identified in a study by  
239 Howard-Ashby *et al.*, which found most were expressed by the gastrula stage (2 dpf), and  
240 with several members expressed in domains derived from all three germ layers (Howard-  
241 Ashby *et al.*, 2006). Our single cell analysis, although at a later developmental time point,  
242 supports these findings, and further refines our understanding of their expression to  
243 specific cell types. In the early pluteus larva, most Homeobox class transcription factors  
244 are enriched in ectodermally derived cell types, such as the apical plate and neurons. In  
245 contrast, ANTP Class and HNF class transcription factors are enriched in endodermal  
246 derivatives (Figure 4). Other major transcription factor families, such as the Forkhead,  
247 Ets, and Zinc-finger families, members of which are expressed throughout sea urchin  
248 embryogenesis (Tu *et al.*, 2006, Rizzo *et al.*, 2006, Materna *et al.*, 2006), are also  
249 expressed across a spectrum of cell types. Forkhead and zinc-finger transcription factors  
250 are highly expressed in specific cell types of all three germ layer derivatives, whereas Ets  
251 family TFs are enriched in ectodermal and mesodermal derivatives (Figure 4).

252 The active regulatory state of a given cell type is an immediate consequence of the gene  
253 regulatory network active at this time point. Previous research in sea urchin has described  
254 in detail many regulatory networks active during embryonic and larval development. Our  
255 scRNA-seq data broadly corroborates previous studies, yet also identifies new domains  
256 and cell types in which these regulatory networks may be active. For instance, we plotted  
257 all transcription factors active in specifying coelomic pouch cells. Our data confirmed their  
258 co-expression in coelomic pouch, but also revealed they were co-expressed in the apical  
259 plate (Figure 5A). Similarly, when plotting genes involved in the aboral ectoderm gene  
260 regulatory network (Ben-Tabou de-Leon *et al.*, 2013), we found all genes in both the  
261 aboral ectoderm cluster as well as in the apical plate cells (Figure 5B). On the other hand,  
262 plotting members of the pre-gastrula skeletogenic mesoderm regulatory network revealed  
263 most were still active in the pluteus larva and specific to skeletal cells (Figure 5C). Finally,  
264 our scRNA-seq recreates a nearly identical 3 dpf endoderm expression pattern atlas as  
265 that published previously by our group using more traditional methods (Annunziata *et al.*,  
266 2014), providing additional information on each gene's average expression and the  
267 percentage of cells expressing each marker (Figure 5- Figure Supplement 1).

Paganos *et al.*,

**Figure 4**

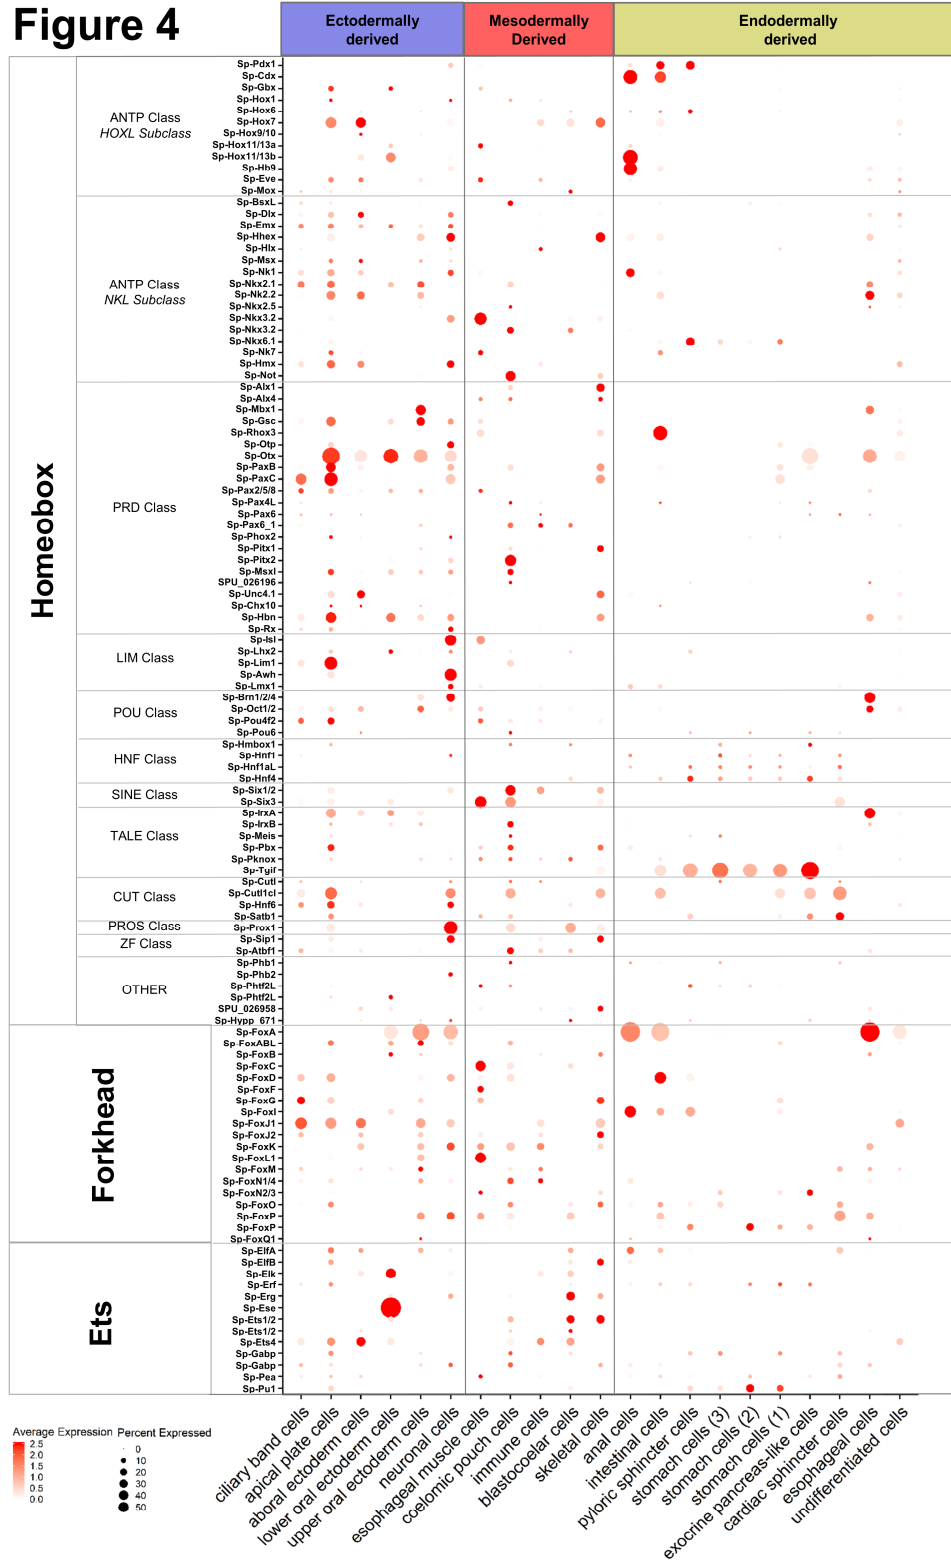

268

269 **Figure 4. Localization of major transcription factor family members.** Dotplot showing the  
 270 average expression of members of the Homeobox, Forkhead and Ets transcription factor families.  
 271 The developmental origins of each cell type are shown in blue for ectodermally derived, red for  
 272 mesodermally derived and yellow for endodermally derived ones.

Paganos *et al.*,

## Figure 5

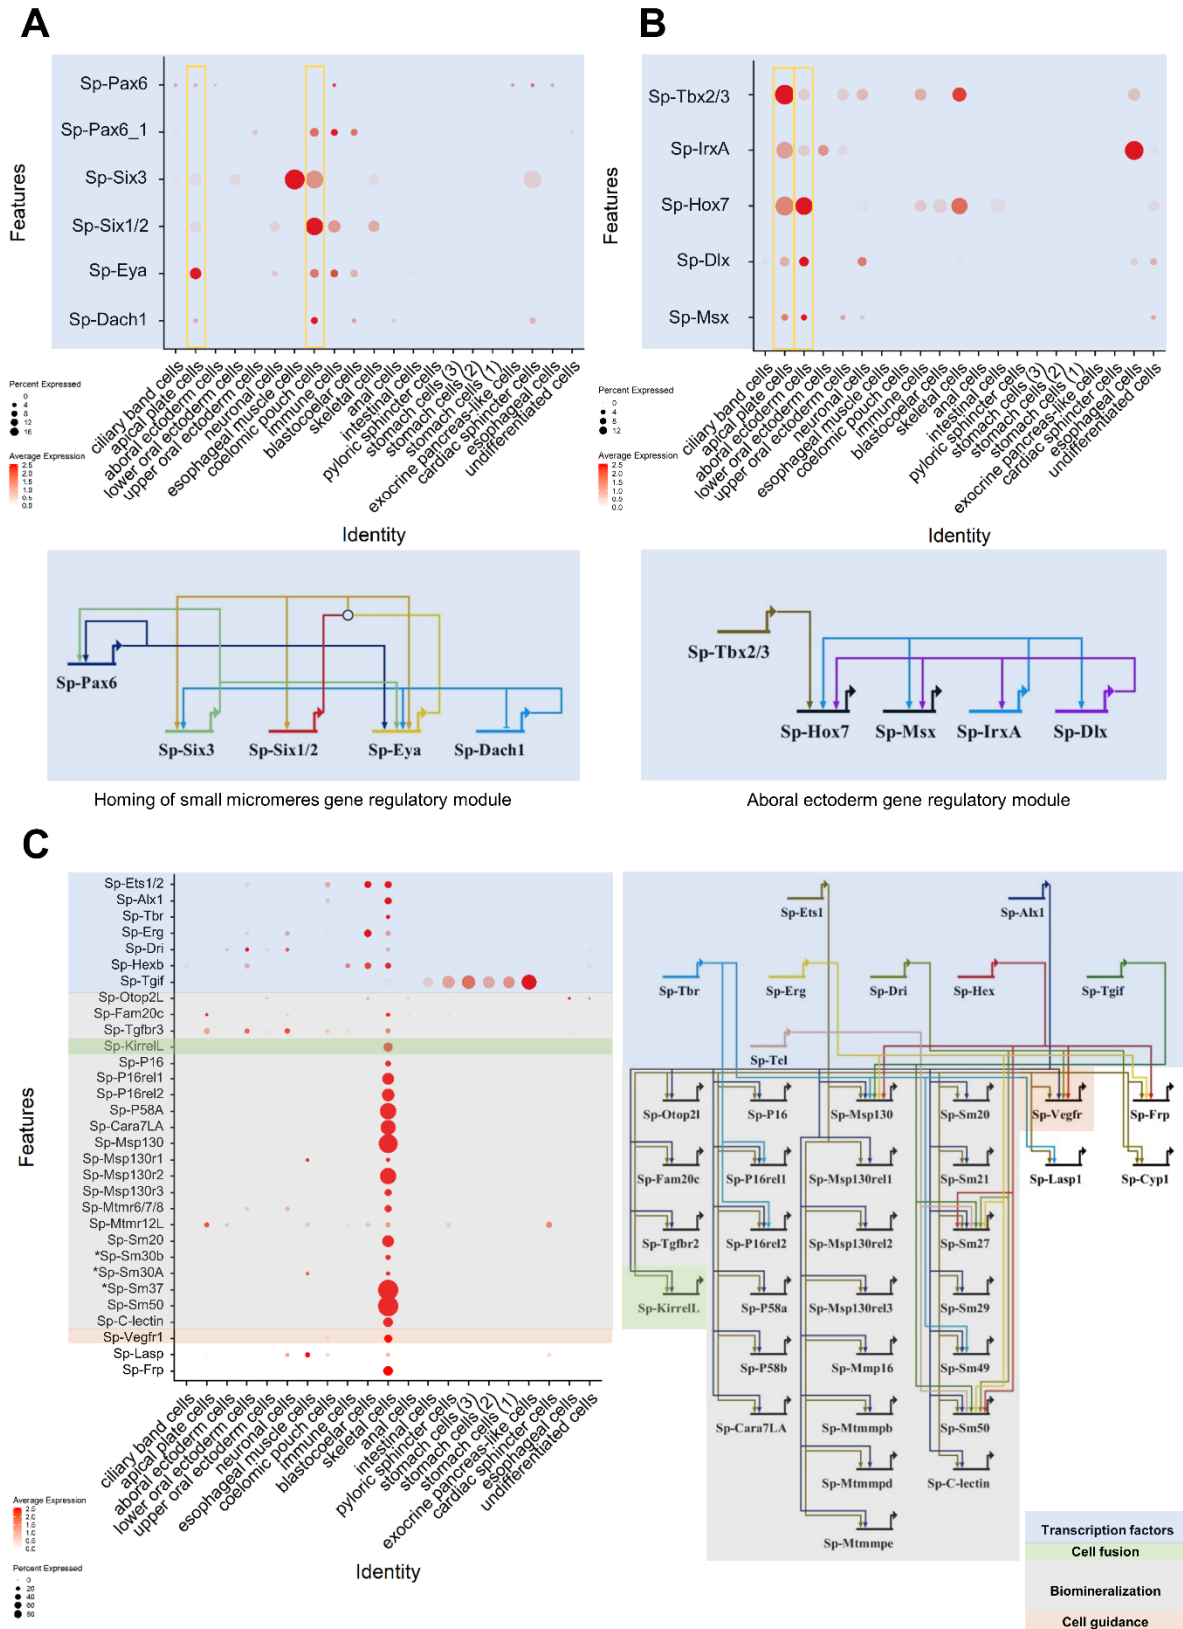

Paganos *et al.*,

274 **Figure 5. Validation of preexisting GRNs and putative novel function of specific gene**  
275 **regulatory modules. A)** Dotplot showing the mRNA localization of genes involved in the homing  
276 of small micromeres to the coelomic pouch and novel apical plate domain. **B)** Dotplot of aboral  
277 ectoderm regulatory module genes showing novel apical plate expression. **C)** Pre-gastrula gene  
278 regulatory network enriched in skeletal cells of the sea urchin pluteus larva. Asterisks indicate  
279 larval genes involved in biomineralization, putative members of this GRN.

280

## 281 **Unravelling the neuronal diversity and molecular signature of the nervous system**

282 The classification of neuronal cell type diversity is an important step for unravelling the  
283 evolution and function of the nervous system. The sea urchin free swimming larva is  
284 equipped with a nervous system consisting of interconnecting ganglia (Burke *et al.*,  
285 2006a) that allows the animal to respond to environmental stimuli and coordinate its  
286 swimming ability (Soliman, 1983, Katow *et al.*, 2010). Several neuronal types, including  
287 apical and ciliary band neurons, as well as neurons along the digestive tube, have been  
288 previously identified and their specification described in detail (Burke *et al.*, 2006a, Burke  
289 *et al.*, 2006b, Wei *et al.*, 2009, Wei *et al.*, 2011, Garner *et al.*, 2016, Wei *et al.*, 2016,  
290 McClay *et al.*, 2018, Perillo *et al.*, 2018, Wood *et al.*, 2018).

291 Our initial clustering analysis resolved single clusters for neuronal cells, as well as for  
292 PMCs and immune cells. However, expression of known markers suggested the  
293 presence of distinct subclusters in each of these cell type groups. In order to investigate  
294 this, we independently performed subclustering and re-analysis of the neuronal, immune,  
295 and PMC cells. Subclustering of each of these initial major clusters revealed 12 neuronal,  
296 8 immune, and 5 PMC subclusters, each likely representing distinct cell types (Figure 6A  
297 and Figure 6- Figure Supplement 1). Two of the immune subclusters expressed  
298 polyketide synthase 1 (*Sp-Pks1*), suggesting these represent sea urchin pigment cells  
299 populations (Calestani and Rogers, 2010). We also found a subcluster of immune cells  
300 that expresses the membrane attack complex/perforin family gene (*Sp-MacpfA2*),  
301 suggesting this corresponds to immune system globular cells (Figure 6-Supplement 2).  
302 Notably, our finding of 5 PMC subclusters corroborates previous reports showing five  
303 distinct groups of PMC cells along the syncytium (Sun and Etensohn, 2014) (Figure 6-  
304 Figure Supplement 1).

305 To identify the 12 neuronal cell types revealed via subclustering we took advantage of the  
306 extensive previous work investigating neurogenesis and neuronal differentiation in sea  
307 urchin. Plotting known neuronal markers, we resolved unique molecular signatures for  
308 each subcluster and assigned each a putative identity and location in the larva (Figures  
309 6B-D). To validate this, we conducted in-situ hybridization experiments for gene markers  
310 labeling these specific neuronal populations (Figure 6D), including genes encoding  
311 transcription factors (*SoxC*, *Delta*, *Ngn*, *Prox1*, *Isl*, *Hbn*, *SoxB2*, *Otx*, *NeuroD1*, *Six3*), and  
312 members of neurotransmitter (*Ddc*, *Nacha6*, *Chrna9\_4*, *Tph*), and neuropeptidergic  
313 signaling pathways (*An*, *Salmfap*, *Trh*).

314

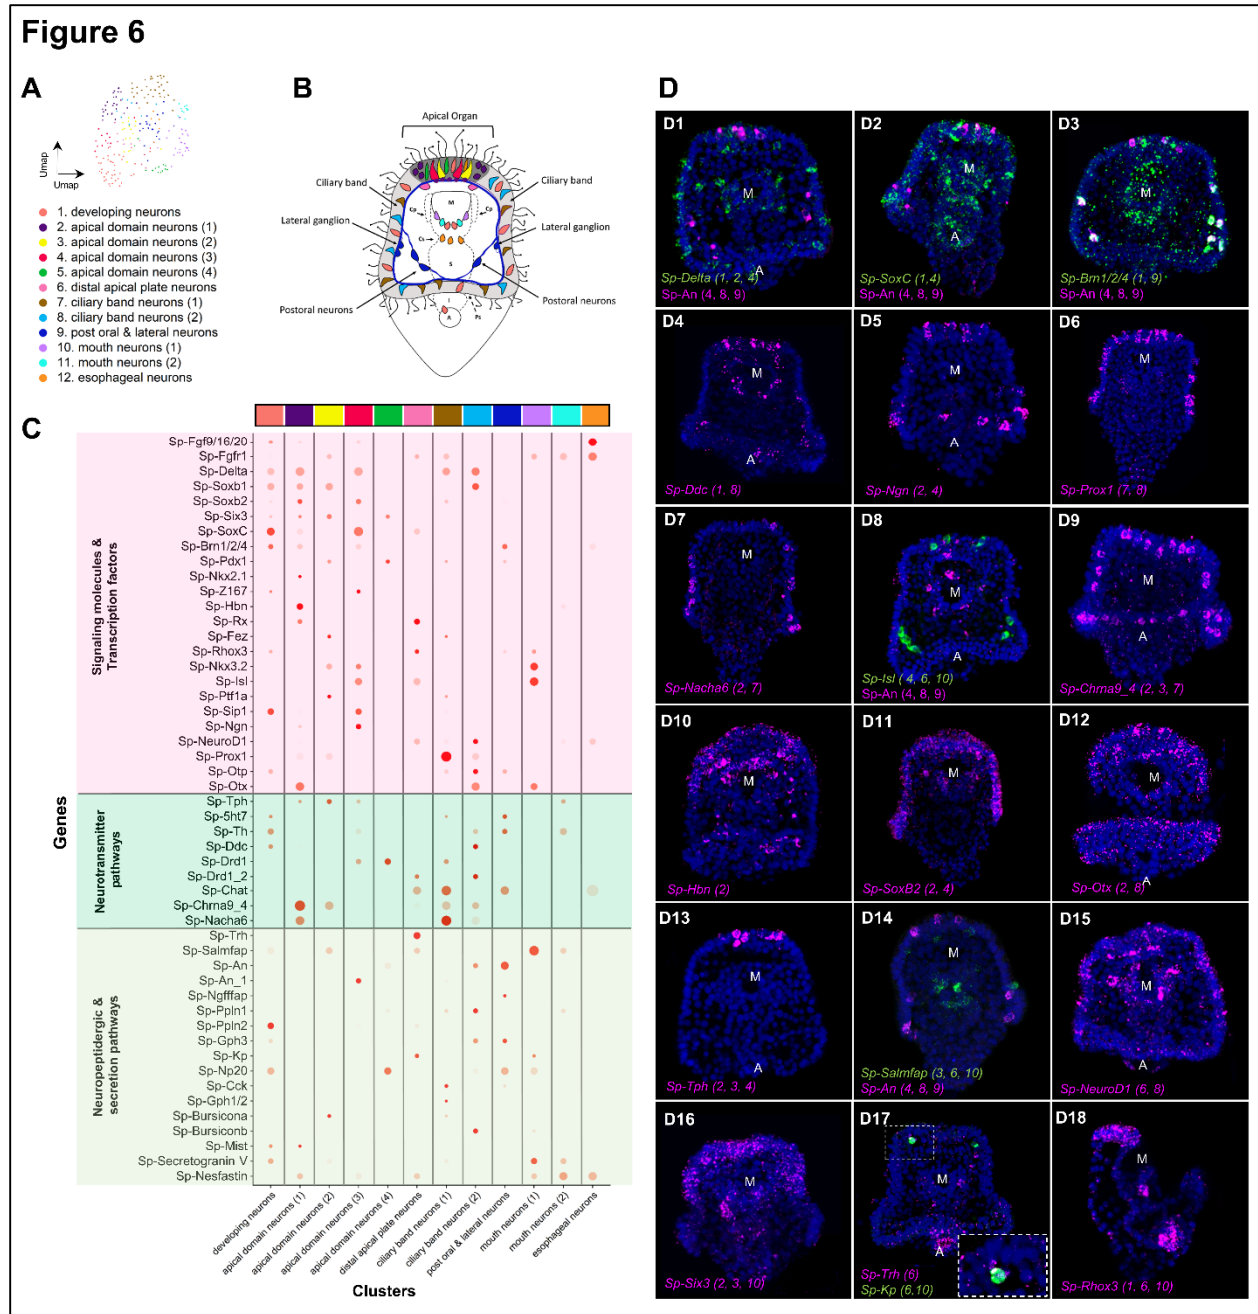

315

316 **Figure 6. Neuronal complexity of the 3 dpf *S. purpuratus* larva.** **A)** UMAP showing 12 distinct  
 317 neuronal subclusters. **B)** Schematic representation of the 3 dpf pluteus larva showing the  
 318 localization of neuronal subclusters (colors as in A). **C)** Dotplot of signaling molecules,  
 319 transcription factors, and neurotransmitters involved in sea urchin neuronal function and  
 320 neurogenesis (colors as in A). **D)** FISH of *S. purpuratus* 3 dpf larvae with antisense probes for the  
 321 neuronal genes *Sp-Delta* (D1), *Sp-SoxC* (D2), *Sp-Brn1/2/4* (D3), *Sp-Ddc* (D4), *Sp-Ngn* (D5), *Sp-*  
 322 *Prox1* (D6), *Sp-Nacha6* (D7), *Sp-Isl* (D8), *Sp-An* (D8 and D14), *Sp-Chrna9\_4* (D9), *Sp-Hbn* (D10),  
 323 *Sp-SoxB2* (D11), *Sp-Otx* (D12), *Sp-Tph* (A13), *Sp-Salmfap* (D14), *Sp-NeuroD1* (D15), *Sp-Six3*  
 324 (D16), *Sp-Trh* (D17), *Sp-Kp* (D17) and *Sp-Rhox3* (D18). FISH shown in figures D1-3 are paired  
 325 with immunohistochemical detection of the neuropeptide Sp-An. Nuclei are labelled with DAPI (in  
 326 blue). All images are stacks of merged confocal Z sections. A, anus; M, mouth.

Paganos *et al.*,

327 The sea urchin larva neuronal differentiation proceeds via stepwise differentiation,  
328 including transient expression of the Notch ligand Delta, followed by expression of the  
329 transcription factors *SoxC* and *Brn1/2/4* (Garner *et al.*, 2016). During final stages of  
330 neurogenesis, the transcription factors *Sip1*, *Z167*, *Ngn* and *Otp* regulate differentiation  
331 of diverse neuronal populations, including apical and ciliary band neurons (Wei *et al.*,  
332 2016, McClay *et al.*, 2018). In our data, we observed *Sp-Delta*, *Sp-SoxC* and *Sp-Brn1/2/4*,  
333 as well different combinations of the transcription factors mentioned above, co-localize in  
334 three neuronal populations (subclusters 1, 2 and 4), indicating neuronal differentiation is  
335 taking place in those three subclusters (Figure 6C). Interestingly, in one of these  
336 populations (subcluster 2) we found expression of the transcription factors *Sp-Rx*, *Sp-*  
337 *Hbn* (Figure 6D10) and *Sp-Six3* (Figure 6D16), which are known to be expressed in the  
338 periphery of the larva's apical domain (Burke *et al.*, 2006a, Wei *et al.*, 2009). This  
339 suggests that this population is located in the periphery of the apical plate and not within  
340 the apical organ. In the apical domain, we also detected a subcluster (number 6), which  
341 coexpress *Sp-Trh* and *Sp-Salmfap* neuropeptides (Wood *et al.*, 2018), as well as *Sp-Kp*  
342 (Kissepeptin) (Figure 6D17). In total, we identified three neuronal subclusters located in  
343 the apical domain (subclusters 2, 3 and 4) of the larva that express Tryptophan  
344 hydroxylase (*Tph*), which encodes a key enzyme in the serotonin biosynthesis pathway,  
345 suggesting these represent serotonergic neurons in the larva. Within the ciliary band,  
346 which comprises the larva's peripheral nervous system (Slota *et al.*, 2020), we identified  
347 two distinct cholinergic subclusters (7 and 8) expressing the enzyme involved in  
348 acetylcholine biosynthesis (*Sp-Chat*) (Figure 6C), one of which (subcluster 8) expresses  
349 also two nicotinic acetylcholine receptors (*Nacha6*, *Chrna9*). Moreover, we identified a  
350 neuronal subcluster in close proximity with the ciliary band, which corresponds to the  
351 lateral and post-oral neurons (subcluster 9). This population has been previously  
352 characterized by our group and was found to co-express *Sp-Pdx1*, *Sp-Brn1/2/4*, and the  
353 neuropeptide Sp-An (Perillo *et al.*, 2018). Using gene markers that mark differentiated  
354 neurons expressed in the rim of the larva's mouth, including *Sp-Nkx3.2* (Wei *et al.*, 2011),  
355 *Sp-Is1* (Perillo *et al.*, 2018), the neuropeptide *Sp-Salmfap* (Wood *et al.*, 2018), and the  
356 enzyme Tyrosine hydroxylase (*Sp-Th*) involved in the dopaminergic pathway, we  
357 identified two distinct mouth neurons subtypes (subclusters 10 and 11; Figure 6C). Lastly,  
358 we found one neuronal population that, based on its molecular signature, is associated  
359 with endodermal structures such as the esophagus (subcluster 12). Overall, our  
360 subclustering analysis increases the resolution of the different neuronal subtypes present  
361 at this developmental stage, describing new neuronal subtypes and providing novel  
362 markers and gene candidates for future studies of these cell types and their gene  
363 regulatory networks.

#### 364 **Characterizing a neuroendocrine neuronal population controlled by Pdx-1**

365 Previous studies from our group suggested that the nervous system of the sea urchin  
366 larva displays a strong pre-pancreatic signature, with neurons expressing genes that are  
367 involved in endocrine cell differentiation in the vertebrate pancreas (Perillo *et al.*, 2018).  
368 To investigate this, we focused on the post oral and lateral neuron subcluster, which co-  
369 expresses *Sp-Pdx1*, *Sp-Brn1/2/4* and *Sp-An* (Figure 6). Double immunohistochemical  
370 staining of the neuronal marker 1E11 and Sp-An shows that these neurons lie in close  
371 proximity to the ciliary band, and project axons towards both the apical plate and ciliary

Paganos *et al.*,

372 band (Figure 7 A1-A3). Double FISH of *Sp-An* and *Sp-FbsL\_2*, a ciliary band marker  
373 revealed by this study, as well as double IHC of *Sp-An* and acetylated tubulin (labeling  
374 cilia), further indicate their distribution relative to the ciliary band (Figure 7 A4-A6).  
375 Moreover, we found that the post-oral *Sp-An* neurons are found in close proximity to cells  
376 of both ciliary band subclusters (Figure 7 A7-A9), and project axons to the cell bodies of  
377 the *Sp-Prox1* positive neurons (Figure 7 A9). We also observed close proximity between  
378 *An* positive neurons in the post oral arms with the cells of the ventral-lateral cluster of  
379 PMCs (Figure 7 A10), and with immune globular cells (Figure 7 A11). Next, we set out to  
380 validate whether novel genes predicted by our single cell analysis to be expressed in this  
381 neuronal population can be validated *in vivo*. Among the genes predicted to be expressed  
382 in this population are the transcription factors *Sp-Nk1* and *Sp-Otp*, as well as the  
383 catecholaminergic and cholinergic neuronal markers *Sp-Th* and *Sp-Chat* (Slota and  
384 McClay, 2018), respectively. Double fluorescent *in situ* hybridization of *Sp-Nk1* and the  
385 neuropeptide *Sp-An*, as well as fluorescent *in situ* hybridization of *Sp-Otp* combined with  
386 the immunohistochemical detection of *Sp-An*, reveal co-localization of these three genes  
387 in the post-oral and lateral neuronal population (Figure 7 A13-A14), verifying the single-  
388 cell data. Additionally, double immunostainings of the anti-*Sp-An* with anti-*Th* (Figure  
389 7A9) and anti-*Chat* antibodies suggest that these two key enzymes, involved in different  
390 neurotransmitter biosynthesis pathways, are co-produced in the *Sp-Pdx1/Sp-Brn1/2/4*  
391 neurons (Figure 7 A12 and A15).

392 The vertebrate orthologue of *Sp-Pdx1* is essential for pancreas development,  $\beta$ -cell  
393 differentiation, and maintaining mature  $\beta$ -cell function (Kaneto *et al.*, 2007). As previously  
394 described by our group, knockdown of the pancreatic transcription factor *Sp-Pdx1* results  
395 in severe downregulation of the *Sp-An* neuropeptide, compromising the neuroendocrine  
396 fate of this neuronal type (Perillo *et al.*, 2018). To further characterize the *Sp-Pdx1/Sp-*  
397 *Brn1/2/4* neuronal population, we performed a comprehensive analysis of genes involved  
398 in pancreatic development and  $\beta$ -cell differentiation, as well as gene markers related to  
399 neuroendocrine fate. We identified a total of 20 transcription factors, all involved in the  
400 formation and proper function of vertebrate endocrine pancreas, which are differentially  
401 enriched in the *Sp-Pdx1/Sp-Brn1/2/4* neurons (Figure 7B). Next, we intersected our  
402 scRNA-seq with bulk RNA sequencing data derived from *Pdx1* morphants assayed at the  
403 same developmental stage in a previous study (Annunziata and Arnone, 2014). By  
404 coupling knowledge of cell type-specific expression programs with genes differentially  
405 expressed in the *Pdx1* knockdown mutants, we were able to identify and refine likely gene  
406 targets specific to the *Sp-Pdx1/Sp-Brn1/2/4* neuronal cell type. In total, we found 249  
407 genes belonging to the *Sp-Pdx1/Sp-Brn1/2/4* neuron subcluster (9) that were differentially  
408 expressed in the *Pdx1* knockdown dataset, with 65% of the targets being downregulated  
409 (Figure 7C). Among the downregulated genes, we found key transcription factors involved  
410 in neuronal differentiation, including *Sp-Brn1/2/4* and *Sp-Otp*, as well as terminal  
411 differentiation genes important in neuronal signaling, such as *Sp-An*, *Sp-Ngffap*, *Sp-Th*  
412 and *Sp-Chat* (Figure 7C). Based on this, we reconstructed a provisional GRN of *Sp-*  
413 *Pdx1/Sp-Brn1/2/4* neurons, reflecting the potential role of *Sp-Pdx1* as an activator of  
414 neuroendocrine fate. Future studies are needed in order to verify these gene interactions  
415 and thus the actual connectivity of the regulatory network, although our approach  
416 highlights the power of integrating single-cell RNAseq data with data from gene  
417 knockdowns.

## Figure 7

### A

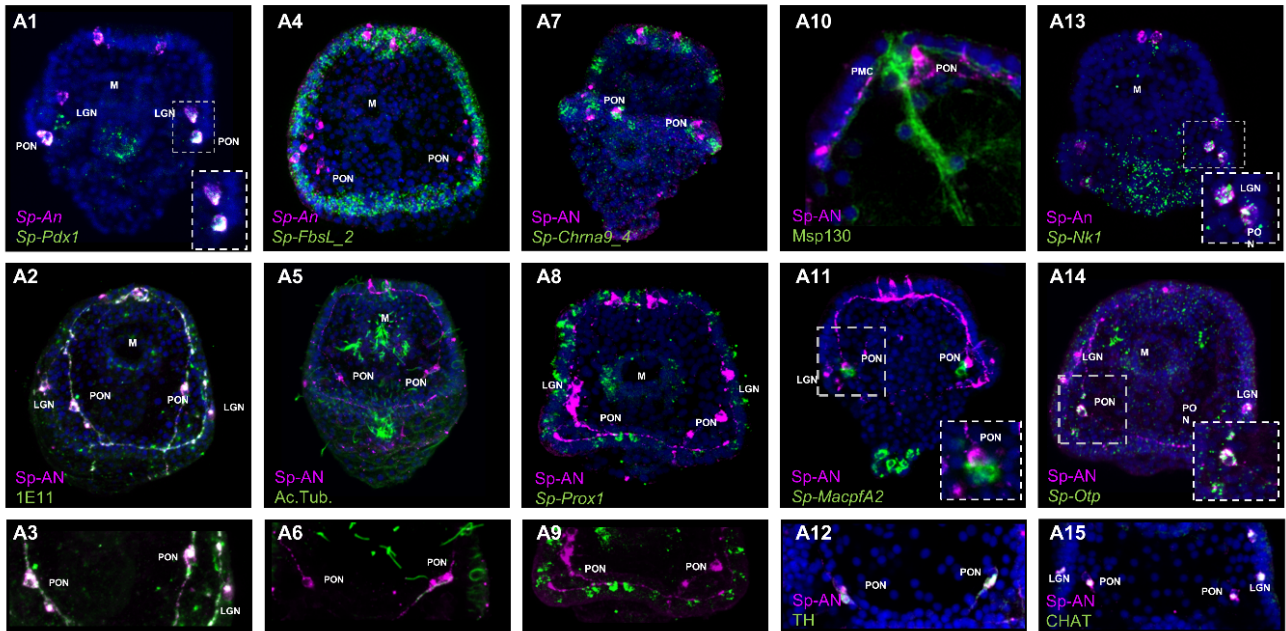

### B

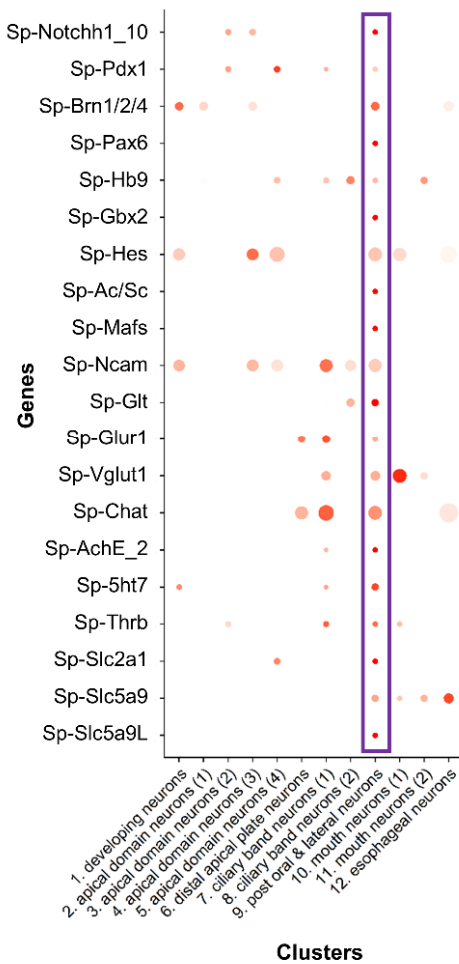

### C

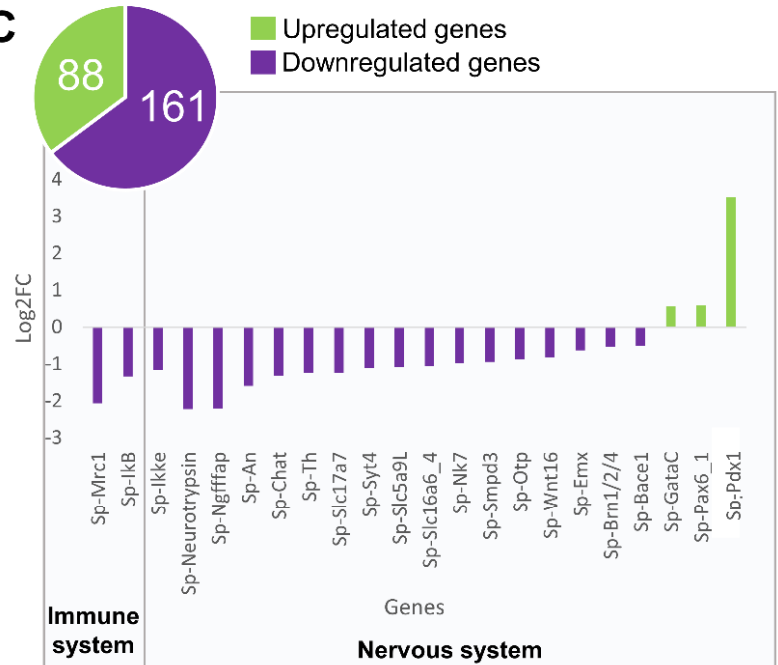

### D

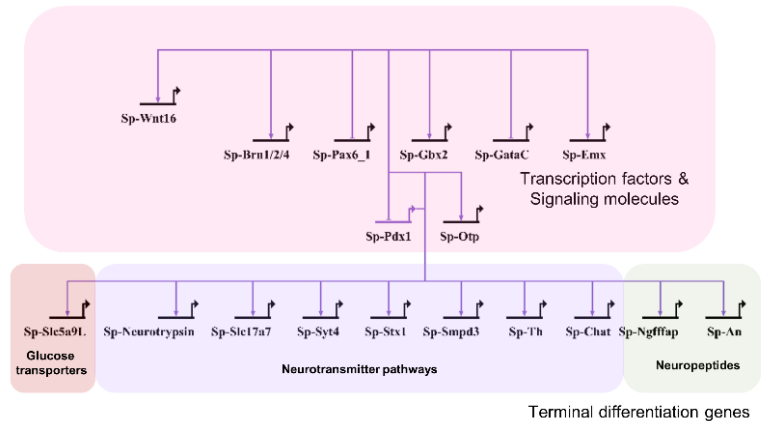



Paganos *et al.*,

419 **Figure 7. scRNA-seq reveals a Pdx-1 dependent neuroendocrine cell type. A)** Molecular  
420 characterization of a *Sp-Pdx1/Sp-Brn1/2/4* double positive neuronal population. A1) Double FISH  
421 of *S. purpuratus* 3 dpf larvae with specific antisense probes for *Sp-Pdx1* and *Sp-An*. A2) Double  
422 immunohistochemical detection of the Sp-An and Synaptotagmin (1E11) proteins. A3) Close up  
423 caption of the Sp-An PON neurons shown in A2. A4) Double FISH of *S. purpuratus* 3 dpf larvae  
424 with specific antisense probes for *Sp-FbsL\_2* and Sp-An. Double immunohistochemical detection  
425 of the Sp-An and acetylated tubulin proteins. A6) Close up caption of the Sp-An PON neurons  
426 shown in A5. A7) FISH of *S. purpuratus* 3 dpf larvae with a specific antisense probe for *Sp-*  
427 *Chrna9\_4* paired with immunodetection of Sp-An. A8) FISH of *S. purpuratus* 3 dpf larvae with a  
428 specific antisense probe for *Sp-Prox1* paired with immunohistochemical detection of Sp-An. A9)  
429 Close up caption of the Sp-An PON neurons shown in A8. A10) Double immunohistochemical  
430 staining for the neuropeptide Sp-An and the skeletal cells marker Msp130. A11) FISH of *S.*  
431 *purpuratus* 3 dpf larvae with a specific antisense probe for *Sp-MacpfA2* paired with  
432 immunohistochemical detection of Sp-An. A12) Double immunohistochemical staining for the  
433 neuropeptide Sp-An and the enzyme Sp-TH. A13) Double FISH of *S. purpuratus* 3 dpf larvae with  
434 specific antisense probes for *Sp-Nk1* and Sp-An. A14) FISH of *S. purpuratus* 3 dpf larvae with a  
435 specific antisense probe for *Sp-Otp* paired with immunohistochemical detection of Sp-An. Double  
436 immunohistochemical staining for the neuropeptide Sp-An and the enzyme Sp-Chat. Nuclei are  
437 labelled with DAPI (in blue). All images are stacks of merged confocal Z sections. LGN, lateral  
438 ganglion neurons; M, Mouth; PON, Post-oral neurons. **B)** Dotplot of genes important in endocrine  
439 pancreas differentiation and function in vertebrates. **C)** Bar plot of selected Sp-Pdx1 target genes  
440 in the *Sp-Pdx1/Sp-Brn1/2/4* positive population as revealed by differential RNA sequencing  
441 analysis of *Sp-Pdx1* knockdown larvae. **D)** Provisional GRN of the *Sp-Pdx1/Sp-Brn1/2/4* neuronal  
442 population as revealed by the combination of scRNA-seq and differential RNA-seq analysis after  
443 *Sp-Pdx1* knockdown.

444

## 445 Discussion

446 Cell type identity is determined by the differential use of genomic information among cells.  
447 Unraveling the distinct transcriptomic signatures of cell types yields valuable insight into  
448 their function, as well their evolutionary and developmental origins. In recent years, single  
449 cell transcriptomics has emerged as a powerful and unbiased approach for characterizing  
450 cell type diversity across a wide variety of animal taxa, with studies spanning insects  
451 (Davie *et al.*, 2018, Severo *et al.*, 2018, Cho *et al.*, 2020), cnidarians (Sebe-Pedros *et al.*,  
452 2018) and sea squirts (Sharma *et al.*, 2019, Cao *et al.*, 2019), as well as vertebrates such  
453 as zebrafish (Wagner *et al.*, 2018, Chestnut *et al.*, 2020), mice (Nestorowa *et al.*, 2016,  
454 Jung *et al.*, 2019, Ximerakis *et al.*, 2019, Yu *et al.*, 2019, Qi *et al.*, 2020) and humans (Yu  
455 *et al.*, 2019, Qi *et al.*, 2020, Esaulova *et al.*, 2020, Zhao *et al.*, 2020).

456 The sea urchin embryo has served as a valuable model for understanding cell type  
457 molecular specification and differentiation via gene regulatory networks. Despite this,  
458 knowledge of later stages of development, including larval cell types, is limited. Here we  
459 used single cell RNA sequencing to generate a detailed atlas of early cell types of the  
460 pluteus larva, and to unravel the neuronal diversity at this critical stage that marks the  
461 end of embryogenesis and the beginning of the larval life cycle.

Paganos *et al.*,

## 462 **Cellular diversity of the *S. purpuratus* pluteus larva**

463 Conducting scRNA-seq on isolated *S. purpuratus* early pluteus cells we initially identified  
464 21 genetically distinct cell clusters from 19.699 cells (Figure 1 A), expressing in total  
465 15.578 genes. Notably, the computationally identified number of cells per cluster did not  
466 correlate well with their actual distribution in the larva. This could be a bias linked to the  
467 dissociation process, as for instance skeletal structures are the last to dissociate and  
468 hence cells can get trapped within the debris and thus be underestimated in our datasets.  
469 Nonetheless, the cell types identified in our study include all known larval cell types,  
470 suggesting we obtained a sufficient number of cells to comprehensively survey cell  
471 diversity at this developmental stage. Further, the total number of genes expressed in our  
472 data was 15.578, in relatively close agreement to the 16.500 genes expressed at the end  
473 of *S. purpuratus* embryogenesis (Tu et al., 2014).

474 Our results reveal a rich tapestry of cell types within the early pluteus larva. In particular,  
475 our study reveals that a majority of transcriptional diversity among cells of the pluteus  
476 larva relates to feeding and digestion. This includes two distinct oral ectoderm cell types,  
477 as well as distinct cell expression programs for the esophagus, cardiac and pyloric  
478 sphincters, exocrine pancreas-like cells, three distinct stomach cell types, intestine and  
479 anus. We also identified the mesodermally derived muscle cell type that ensures the  
480 proper function of the digestive apparatus by regulating the flow of the water containing  
481 food within the different compartments of the gut.

482 Beyond our initial cell clusters, we used subclustering to uncover diversity among  
483 neuronal, PMC, and immune cells in the pluteus larva. Among immune cells, the presence  
484 of two pigment cell subclusters is in line with findings by Perillo and colleagues that  
485 revealed two such populations (Perillo et al., 2020). However, in our study we found that  
486 only one cluster is *Sp-Gcm* positive, in contrast to their findings which found both of their  
487 clusters expressed *Sp-Gcm*. This difference could be a result of the different approaches  
488 used to identify the different cell types or due to transient expression of *Sp-Gcm* in the  
489 additional pigment cell type.

490 The larval nervous system has been among the first echinoderm cell types to be  
491 characterized at a molecular level and yet the exact number of neuronal subtypes is still  
492 not clear. Extensive work has been done on identifying the molecular pathways guiding  
493 neuronal specification and the genes active during neuronal differentiation, however this  
494 is limited to describing general neuronal categories. Most of the current information on  
495 the different neuronal types relies on detection of specific neuropeptides,  
496 neurotransmitters and enzymes involved in their biosynthesis. The most recent estimate  
497 of neuronal diversity used neuropeptidergic content to identify seven distinct neuronal  
498 types (Wood et al, 2018). Our study supports and refines this earlier work by providing a  
499 comprehensive and unbiased survey of neuronal diversity in the early pluteus larva of *S.*  
500 *purpuratus*.

501 Neurons in *S. purpuratus* arise from two ectodermal neurogenic regions (ciliary band and  
502 apical domain) and from the anteriormost part of the foregut (Garner et al., 2016, McClay  
503 et al., 2018, Wei et al., 2011), which is derived from endoderm. Different neuronal types  
504 from these domains arise at different developmental time points, although by 3 dpf most  
505 larval neurons are thought to be present and patterning diverse larval domains. Notably,

Paganos *et al.*,

506 our initial clustering analysis recovered neurons as a single cluster, suggesting they share  
507 a common molecular signature regardless of their developmental origin. Subclustering of  
508 these revealed twelve distinct neuronal cell types, which we were able to trace back on  
509 the larva. By doing so, we identified one cell type apparently undergoing differentiation,  
510 four associated with the apical domain, one matching the distal apical plate neurons, two  
511 corresponding to ciliary band neurons, two located in the rim of the mouth, one associated  
512 with esophageal structures, and one corresponding to the post-oral and lateral neurons.  
513 Thus, our study greatly enhances our knowledge of neuronal diversity in the *S. purpuratus*  
514 larva, nearly doubling the number of known neuronal cell types at this developmental  
515 stage.

516 Lastly, we also found one major cell cluster that could not be traced back to a specific  
517 domain, and we speculate that it consists of non-differentiated cells, owing to their weak  
518 transcriptomic identity compared to the rest of the cell types (Figure 1- Figure supplement  
519 1D). Overall, this cluster exhibited greatest transcriptional similarity to cell types derived  
520 from the ectoderm (Figure 1- Figure supplement 1E, Figure 3 Figure Supplement 1),  
521 suggesting it may also be of ectodermal origin. Consistent with this, a recent study by  
522 Perillo *et al.* revealed a similar uncharacterized ectodermal cell type (Perillo *et al.*, 2020),  
523 further suggesting this cell population exists and is not solely an artifact of our analysis.  
524 Taking into account the great plasticity and regeneration capability of the sea urchin larva,  
525 it is also possible that this non-differentiated ectodermal cell type is a progenitor  
526 population in stasis, waiting to being activated. Future studies are necessary to validate  
527 its identity, function, and origin during larval development.

528

## 529 **Sp-Pdx1 as a regulator of neuroendocrine fate**

530 Morphogenesis and organogenesis rely on the hierarchical control of gene expression as  
531 encompassed in the GRNs. During evolution, gene regulatory elements were co-opted  
532 and incorporated to different developmental or morphogenetic programs to give rise to  
533 diverse cell types (Monteiro, 2012, Preger-Ben Noon and Frankel, 2015, Martik and  
534 McClay, 2015, Hu *et al.*, 2018, Morgulis *et al.*, 2019, McQueen and Rebeiz, 2020, Cary  
535 *et al.*, 2020). It has been previously hypothesized that  $\beta$  pancreatic cells arose during  
536 evolution by co-option of a preexisting neuronal cell type program into the pancreas  
537 developmental lineage (Arntfield and van der Kooy, 2011, Perillo *et al.*, 2018) based on  
538 the many physiological, morphological and molecular features endocrine pancreatic cells  
539 share with neurons (Alpert *et al.*, 1988, Eberhard, 2013).

540 Although sea urchins diverged from chordates prior to the origin of the pancreas, we have  
541 previously demonstrated that the neurogenic and neuronal territories of the sea urchin  
542 embryo and larva have a strong pancreatic-like molecular signature (Perillo *et al.*, 2018).  
543 Interestingly, one neuronal population was found to express *Sp-Pdx1* and *Sp-Brn1/2/4*,  
544 as well as the echinoderm-specific neuropeptide An. *Pdx1* in mammals is essential for  
545 proper pancreatic formation,  $\beta$ -cell differentiation and regulation of the mature  $\beta$ -cells  
546 physiology and function (Hui and Perfetti, 2002). In mice, *Pdx1* is on top of the gene  
547 regulatory hierarchy and its knockout leads to endocrine dysfunctions and absence of  
548 pancreas (Kaneto *et al.*, 2008). In sea urchins, *Sp-Pdx1* is also found to be expressed in  
549 multiple posterior gut cell types, where it is essential for the digestive tube

Paganos *et al.*,

550 compartmentalization and thus proper function (Cole et al., 2009). On the other hand,  
551 the vertebrate orthologue of *Sp-Brn1/2/4*, *Brn4* is expressed in the  $\alpha$  pancreatic cells,  
552 where it acts as a key differentiation factor of this lineage (Hussain et al., 2002).

553 The gene regulatory cascade leading to the endocrine pancreas formation in vertebrates  
554 has been described in great detail and several transcription factors have been  
555 characterized as essential for this process (Zaret and Grompe, 2008, Tritschler et al.,  
556 2017). The initial steps of the differentiation of a pancreatic progenitor cell includes Notch  
557 signaling, which is involved in determining whether a pancreatic cell remains in a  
558 progenitor state or adopting an endocrine or exocrine fate. The signaling cascade results  
559 in transcriptional activation of *Hes/hairy* and enhancer of split and *Hes1* that repress *Ascl1*  
560 (Ishibashi et al., 1995, de la Pompa et al., 1997, Iso et al., 2003). The transcription factor  
561 *Pax6*, a master-gene involved in several biological processes, is a crucial element in the  
562 pancreatic cell differentiation cascade and is important for maintaining the differentiated  
563 state of the mature  $\beta$  cell (Hart et al., 2013, Mitchell et al., 2017, Buckle et al., 2018). On  
564 the other hand, loss of the homeobox transcription factor *Hb9* in zebrafish results in  
565 inhibition of insulin production, while loss of its mice homologue results in abolishment of  
566 the pancreatic differentiation program (Li et al., 1999, Arkhipova et al., 2012). Similarly,  
567 the transcription factor *Mafs* negatively regulates  $\beta$ -cell function by competing with *MafA*,  
568 a transcription factor crucial for insulin synthesis, while *Gbx2* has been found to be  
569 expressed in the insulin-producing MIN6 cell lines (Mizusawa et al., 2004), in which its  
570 role remains unknown.

571 Here, we dissected the molecular fingerprint of the *Sp-Pdx1/Sp-Brn1/2/4* neuronal type  
572 and identified the presence of genes involved in pancreatic development as well as of  
573 genes known to be expressed in both endocrine pancreatic cells and neurons. From our  
574 scRNA-seq analysis it is evident that *Sp-Notch*, *Sp-Pax6*, *Sp-Hb9*, *Sp-Hes*, *Sp-Ac/Sc* (the  
575 orthologue of ASCL1), *Sp-Mafs* and the recently re-annotated *Sp-Gbx2* (previously  
576 annotated as *Sp-Nk7*- <https://new.echinobase.org>) are all expressed in the *Sp-Pdx1/Sp-*  
577 *Brn1/2/4* neurons. This suggests that these neurons of a non-chordate deuterostome  
578 have a gene regulatory machinery similar to the endocrine pancreas cells, consistent with  
579 the hypothesis that  $\beta$  pancreatic cells evolved from gut progenitors adopting a preexisting  
580 neuronal cell type program.

581 It has also been demonstrated that both endocrine pancreas and neuronal cells share  
582 similar features and are able to produce and respond to several neuronal genes and  
583 neurotransmitters. Interestingly, we were able to identify these shared components in our  
584 *Sp-Pdx1/Sp-Brn1/2/4* neurons. For instance, the neural cell adhesion molecule *Ncam*  
585 known to be produced in the nervous system and endocrine cells of the rat is also  
586 expressed in this cluster (Langley et al., 1989). Moreover, these neurons also express  
587 genes encoding members of the glutamate signaling pathway (*Sp-Glt*: glutamate  
588 synthase; *Sp-Vglut1*: glutamate transporter; *Sp-Glur1*: glutamate receptor), which in  
589 mammals are involved in glucose-responsive insulin secretion (Gonoi et al., 1994,  
590 Maechler and Wollheim, 1999), and tyrosine hydroxylase (*Th*), the rate-limiting enzyme  
591 of catecholamine biosynthesis, which is present in the endocrine pancreas of multiple  
592 species (Teitelman et al., 1993, Iturriza and Thibault, 1993). Furthermore, *Sp-Pdx1/Sp-*  
593 *Brn1/2/4* neurons express choline acetyltransferase (*Chat*), which has been found to be

Paganos *et al.*,

594 highly expressed in human pancreatic islets and may be essential for the stimulation of  
595 insulin secretion by the neighboring  $\beta$ -cells (Rodriguez-Diaz *et al.*, 2011).

596 Additionally, serotonergic signaling is believed to be involved in the regulation of insulin  
597 secretion as several serotonin receptors have been found to be expressed in human  
598 pancreatic islets (Amisten *et al.*, 2015). Transcripts of the sea urchin serotonin receptor  
599 *Sp-5ht7* are present in *Sp-Pdx1/Sp-Brn1/2/4* neuronal population suggesting the  
600 serotonin might regulate the neurotransmitter/neuropeptide secretion in a similar way as  
601 for insulin. Similarly, transcripts of the Thyroid hormone receptor B are also found in this  
602 population, suggesting that thyroid hormone signaling may play a similar role to its  
603 differentiation similar to the one in murine endocrine pancreas differentiation (Aiello *et al.*,  
604 2014). The hormone secretion mediated by pancreatic endocrine cells depends on their  
605 ability to detect changes in extracellular glucose levels. To this end, they are equipped  
606 with Glucose transporters and co-transporters (Navale and Paranjape, 2016, Berger and  
607 Zdzienlo, 2020). Our analysis revealed that the *Sp-Pdx1/Sp-Brn1/2/4* neurons produce  
608 transcripts of three glucose co-transporter genes (*Sp-Slc2a1*, *Sp-Slc5a9* and *Sp-*  
609 *Slc5a9L*) proposing that they are able to detect such changes in glucose levels similarly  
610 to the endocrine pancreas cells.

611 Based on the significant role of all those genes in regulation, production and secretion of  
612 Insulin the question arises of whether these pancreatic-like cells in *S. purpuratus* are able  
613 to produce insulin. As previously demonstrated by our group (Perillo and Arnone, 2014)  
614 the sea urchin genome contains two genes encoding two Insulin-like peptides, Sp-ILP1  
615 and Sp-ILP2. The gene structure of *Sp-ILP1* is evolutionarily conserved with vertebrate  
616 Insulin, whereas *Sp-ILP2* has diverged more substantially. Transcripts of *Sp-ILP1* were  
617 found localized in the gut starting from the 10 dpf pluteus larva, whereas transcripts of the  
618 divergent *Sp-ILP2* were found enriched in the coelomic pouch and esophageal structures  
619 of the 3 dpf pluteus larva (Perillo and Arnone, 2014). However, at this developmental time  
620 point (3 dpf) we were not able to detect transcripts for any of the insulin like genes in  
621 these neurons. One hypothesis is that these neurons produce Insulin only later in  
622 development, which is in line with the previous observation that Sp-Ilp1 is only found to  
623 be expressed at 10 dpf pluteus larva and onwards (Perillo and Arnone, 2014). Another  
624 hypothesis is that the *Sp-Pdx1/Sp-Brn1/2/4* neurons do not produce Insulin and that the  
625 Insulin regulating machinery is reutilized for different functions. One of them could be the  
626 regulation of the production and secretion of different hormones and peptides such as  
627 growth factors, neuropeptides and neurotransmitters. Based on the fact that *Sp-Pdx1* is  
628 necessary for the differentiation of these neurons as demonstrated by both the study by  
629 Perillo *et al.*, 2018 and this study, and that these neurons are able to produce several  
630 neuromodulators (Figure 6C and Figure 7B), we favor the hypothesis that this gene  
631 regulatory machinery is used to regulate the differentiation of those neurons as well as  
632 the activity and production of neuromodulators (Sp-An, Sp-Ngffap, Dopamine,  
633 Acetylcholine). Nonetheless, future studies are needed to shed light on whether these  
634 pancreatic-like neurons in sea urchin produce Insulin, and the exact and function and  
635 regulatory connections of pancreatic genes in the differentiation cascade of these cells.

636 Taken together, our data show that the *Sp-Pdx1/Sp-Brn1/2/4* neurons express key genes  
637 that are necessary for the endocrine pancreas differentiation and function. The presence  
638 of such genes in the neurons of a non-chordate deuterostome that lacks a pancreas as a

Paganos *et al.*,

639 distinct organ strengthens the argument that pancreatic cells arose by redeploing a pre-  
640 existing neuronal cell type into pancreatic development. The shared features of *Sp-*  
641 *Pdx1/Sp-Brn1/2/4* and pancreatic cells suggest these represent features of a cell type  
642 present in the deuterostome ancestor.

643

## 644 **Materials and Methods**

### 645 **1. Animal husbandry and culture of embryos**

646 Adult *Strongylocentrotus purpuratus* individuals were obtained from Patrick Leahy  
647 (Kerckhoff Marine Laboratory, California Institute of Technology, Pasadena, CA,  
648 USA) and maintained in circulating seawater aquaria at Stazione Zoologica Anton  
649 Dohrn in Naples. Gametes were obtained by vigorous shaking of the animals.  
650 Embryos and larvae were cultured at 15°C in filtered Mediterranean Sea water  
651 diluted 9:1 with de-ionized water.

652

### 653 **2. Larvae dissociation**

654 Dissociation of the 3 dpf *Strongylocentrotus purpuratus* plutei into single cells was  
655 performed according to adaptation of several protocols (McClay, 1986, McClay,  
656 2004, Juliano et al., 2014). Larvae were collected, concentrated using a 40 µm  
657 Nitex mesh filter and spun down at 500 g for 5 min. Sea water was removed and  
658 larvae were resuspended in Ca<sup>2+</sup> Mg<sup>2+</sup>-free artificial sea water. Larvae were spun  
659 down at 500 g for 5 min and resuspended in dissociation buffer containing 1M  
660 glycine and 0.02 M EDTA in Ca<sup>2+</sup> Mg<sup>2+</sup>-Free artificial sea water. Larvae were  
661 incubated for 10 min on ice and mixed gently via pipette aspiration every 2 min.  
662 From that point and onwards the progress of dissociation was monitored.  
663 Dissociated cells were spun down at 700 g for 5 min and washed several times  
664 with Ca<sup>2+</sup> Mg<sup>2+</sup>-Free artificial sea water. Cell viability was assessed via using  
665 Propidium Iodide and Fluorescein diacetate and only specimens with cell viability  
666 ≥ 90% were further processed. Single cells were counted using a hemocytometer  
667 and diluted according to the manufacturer's protocol (10x Genomics). Throughout  
668 this procedure samples were kept at 4°C.

669

### 670 **3. Single cell RNA sequencing**

671 Single cell RNA sequencing was performed using the 10x Genomics single cell  
672 capturing system. Specimens from four independent biological replicates, ranging  
673 from 6000-20.000 cells, were loaded on the 10X Genomics Chromium Controller.  
674 Single cell cDNA libraries were prepared using the Chromium Single Cell 3'  
675 Reagent Kit (Chemistries v2 and v3). Libraries were sequenced by GeneCore  
676 (EMBL, Heidelberg, Germany) for 75 bp paired-end reads (Illumina NextSeq 500),  
677 resulting in a mean of 88M reads. Cell Ranger Software Suite 3.0.2 (10x  
678 Genomics) was used for the alignment of the single-cell RNA-seq output reads and  
679 generation of feature, barcode and matrices. The genomic index was made in Cell

Paganos *et al.*,

680 Ranger using the *S. purpuratus* genome version 3.1 (Sea Urchin Genome  
681 Sequencing *et al.*, 2006, Kudtarkar and Cameron, 2017). Cell Ranger output  
682 matrices for four biological and two technical replicates were used for further  
683 analysis in Seurat v3.0.2 R package (Stuart *et al.*, 2019). The analysis was  
684 performed according to the Seurat scRNA-seq R package documentation (Butler  
685 *et al.*, 2018, Stuart *et al.*, 2019). Genes that are transcribed in less than three cells  
686 and cells that have less than a minimum of 200 transcribed genes were excluded  
687 from the analysis. The cutoff number of transcribed genes was determined based  
688 on feature scatter plots and varies depending on the replicate. 19,699 cells out of  
689 the 29,130 cells estimated by Cell Ranger passed the quality checks and were  
690 further analyzed. Datasets were normalized and variable genes were found using  
691 the vst method with a maximum of 2000 variable features. Data integration was  
692 performed via identification of anchors between the six different objects. Next the  
693 datasets were scaled and principal component (PCA) analysis was performed.  
694 Nearest Neighbor (SNN) graph was computed with 20 dimensions (resolution 1.0)  
695 to identify the clusters. Uniform Manifold Approximate and Projection (UMAP) was  
696 used to perform clustering dimensionality reduction. Cluster markers were found  
697 using the genes that are detected in at least 0.01 fraction of min.pct cells in the two  
698 clusters. Transcripts of all genes per cell type were identified by converting a  
699 Seurat DotPlot with all these transcripts as features into a table (ggplot2 3.2.0 R  
700 package). Subclustering analysis was performed by selecting a cell type of interest  
701 and performing similar analysis as described above. All resulting tables containing  
702 the genes transcribed within different cell types were further annotated adding  
703 PFAM terms (Trapnell *et al.*, 2010, Finn *et al.*, 2014) for associated proteins, gene  
704 ontology terms and descriptions from Echinobase (Kudtarkar and Cameron, 2017).  
705 Further details about the steps of the computational analysis can be found in the  
706 “Sp3dpf\_clustering\_analysis.Rmd” R Markdown object.

707

#### 708 **4. Whole mount RNA Fluorescent *in situ* hybridization**

709 Fluorescent *in situ* hybridization was performed as outlined in (Perillo *et al.*, 2021).  
710 Fluorescent signal was developed via using fluorophore conjugated tyramide  
711 technology (Perkin Elmer, Cat. #NEL752001KT). Antisense probes were  
712 transcribed from linearized DNA and labeled either during transcription via using  
713 digoxigenin-11-UTP nucleotides, or post-transcriptionally by using Fluorescein  
714 (Mirus Bio, Cat. #MIR3200) or DNP (Mirus Bio, Cat. #MIR3825) following the  
715 manufacturer’s instructions. Probes for *Sp-Pdx1*, *Sp-Cdx*, *Sp-ManrC1A*, *Sp-*  
716 *Six1/2*, *Sp-Fgf9/16/20*, *Sp-Brn1/2/4*, *Sp-Ngn*, *Sp-Isl*, *Sp-NeuroD1*, *Sp-Pks1*, *Sp-*  
717 *SoxB2*, *Sp-An*, *Sp-Trh* and *Sp-Salmfap* were produced as previously published  
718 [*Sp-Pdx1*, *Sp-Cdx* (Cole *et al.*, 2009), *Sp-ManrC1A* (Annunziata *et al.*, 2014), *Sp-*  
719 *Six1/2*, *Sp-Fgf9/16/20* (Andrikou *et al.*, 2015), *Sp-Brn1/2/4* (Cole and Arnone,  
720 2009), *Sp-Ngn*, *Sp-Isl*, *Sp-NeuroD1* (Perillo *et al.*, 2018), *Sp-Pks1* (Perillo *et al.*,  
721 2020), *Sp-SoxB2* (Anishchenko *et al.*, 2018), *Sp-An*, *Sp-Trh*, *Sp-Salmfap* (Wood  
722 *et al.*, 2018)]. Primer sequences used for cDNA isolation and probes synthesis are

Paganos *et al.*,

723 in Supplementary material. Specimens were imaged using a Zeiss LSM 700  
724 confocal microscope.

725

## 726 **5. Immunohistochemistry (IHC)**

727 Immunohistochemical staining or IHC paired with FISH was performed as  
728 described in (Perillo *et al.*, 2021). Briefly 3 dpf plutei were fixed in 4 %  
729 paraformaldehyde (PFA) in filtered sea water (FSW) for 15 min at room  
730 temperature (RT). FSW was removed and samples were incubated in 100%  
731 methanol for 1 min at RT, washed multiple times with phosphate buffer saline with  
732 0.1% Tween 20 (PBST) and incubated blocking solution containing 1 mg/ml Bovine  
733 Serum Albumin (BSA) and 4% sheep in PBST for 1h. Primary antibodies were  
734 added in the appropriate dilution and incubated for 1h and 30 min at 37°C. Anti-  
735 acetylated alpha tubulin (Sigma-Aldrich T67930) was used to label cilia and  
736 microtubules (1:200), Anti-Msp130 (gift from Dr. David R. McClay) to label  
737 skeletogenic cells (undiluted), 1E11 (gift from Dr. Robert Burke) to mark the  
738 nervous system (undiluted), 5c7 (gift from Dr. David R. McClay) to label the  
739 endoderm (undiluted), Sp-An to label the post-oral and lateral neurons (1:250),  
740 Sp-Th (Sigma-Aldrich AB152) to label catecholaminergic neurons (1:100) and Sp-  
741 Chat (GeneTex GXGTX113164S) to label cholinergic neurons. Specimens were  
742 washed multiple times with PBST and incubated for 1h with the appropriate  
743 secondary antibody (AlexaFluor) diluted 1:1000 in PBST. Larvae were washed  
744 several times with PBST and imaged using a Zeiss LSM 700 confocal microscope.

745

## 746 **6. EdU labelling paired with immunohistochemistry**

747 In order to understand the spatial distribution of proliferating cells across the  
748 putative broad cell types cell proliferation assays were carried out using Click-It  
749 EdU Cell Proliferation Kit for Imaging Alexa Flour™ 647 (Thermo Fisher Scientific).  
750 Larvae were treated with EdU at a final concentration of 10 mM in FSW and let to  
751 grow for 2 hours. Samples were fixed in 4% PFA in FSW for 15 min (RT) and  
752 washed several times with PBST. PBST was removed, replaced by 100%  
753 Methanol for 1 min (RT) and followed by several washes with PBST. After this step  
754 one can continue with either developing the EdU signal or performing  
755 immunohistochemistry as described above. In order to develop the EdU signal the  
756 Click-iT™ reaction mix was prepared according to the manufacturer's guidelines.  
757 PBST was removed and the reaction mix was added to the samples for 30 min  
758 (RT). Larvae were washed several times with PBST, mounted and imaged using  
759 a Zeiss LSM 700 confocal microscope

760

## 761 **7. Gene regulatory network draft**

762 Gene regulatory modules and networks were drafted using the interactive tool for  
763 building and visualizing GRNs BioTapestry (Longabaugh, 2012).

764



Paganos *et al.*,

## 765 **Competing interests**

766 The authors declare no competing interests, or appearance of competing interests, in the  
767 production and dissemination of this work.

768

## 769 **Acknowledgements**

770 The authors would like to thank Prof. Paola Oliveri (UCL) for providing critical input on the  
771 analysis and structure of the manuscript. We are grateful to Drs. David McClay and Robert  
772 Burke for kindly providing antibodies and Dr. Francesco Lamanna (ZMBH) for helping with  
773 the computational analysis. We also would like to thank Davide Caramiello for taking care  
774 of the adult sea urchins, Dr. Giovanna Benvenuto (SZN) for microscopy assistance and  
775 the Arnone lab members Maria Cocorullo and Inés Fournon Berodia for their help in gene  
776 cloning and preparation of RNA probes. We also thank Drs. Vladimir Benes and Bianka  
777 Baying (GeneCore, Heidelberg, Germany) for sequencing of our single cell datasets.  
778 Also we are grateful to the animal technician Emily Savage (EMBL, Heidelberg, Germany)  
779 for her precious assistance.

780

## 781 **Funding**

782 This project has been supported by the European Union's Horizon 2020 research and  
783 innovation programme under the Marie Skłodowska-Curie grant agreement no. 766053  
784 (EvoCELL: grant to MIA and DA, fellowship to PP) and the Advanced grant  
785 'NeuralCellTypeEvo' 788921 by the European Commission (grant to DA and JM).

786

## 787 **References**

- 788 ADOMAKO-ANKOMAH, A. & ETTENSOHN, C. A. 2014. Growth factors and early  
789 mesoderm morphogenesis: insights from the sea urchin embryo. *Genesis*, 52,  
790 158-72.
- 791 AIELLO, V., MORENO-ASSO, A., SERVITJA, J. M. & MARTIN, M. 2014. Thyroid  
792 hormones promote endocrine differentiation at expenses of exocrine tissue. *Exp*  
793 *Cell Res*, 322, 236-48.
- 794 AMISTEN, S., NEVILLE, M., HAWKES, R., PERSAUD, S. J., KARPE, F. & SALEHI, A.  
795 2015. An atlas of G-protein coupled receptor expression and function in human  
796 subcutaneous adipose tissue. *Pharmacol Ther*, 146, 61-93.
- 797 ANDRIKOU, C., IOVENE, E., RIZZO, F., OLIVERI, P. & ARNONE, M. I. 2013.  
798 Myogenesis in the sea urchin embryo: the molecular fingerprint of the myoblast  
799 precursors. *Evodevo*, 4, 33.
- 800 ANDRIKOU, C., PAI, C. Y., SU, Y. H. & ARNONE, M. I. 2015. Logics and properties of  
801 a genetic regulatory program that drives embryonic muscle development in an  
802 echinoderm. *Elife*, 4.
- 803 ANGERER, R. C. & DAVIDSON, E. H. 1984. Molecular indices of cell lineage  
804 specification in sea urchin embryos. *Science*, 226, 1153-60.

Paganos *et al.*,

- 805 ANISHCHENKO, E., ARNONE, M. I. & D'ANIELLO, S. 2018. SoxB2 in sea urchin  
806 development: implications in neurogenesis, ciliogenesis and skeletal patterning.  
807 *Evodevo*, 9, 5.
- 808 ANNUNZIATA, R., ANDRIKOU, C., PERILLO, M., CUOMO, C. & ARNONE, M. I. 2019.  
809 Development and evolution of gut structures: from molecules to function. *Cell*  
810 *Tissue Res*, 377, 445-458.
- 811 ANNUNZIATA, R. & ARNONE, M. I. 2014. A dynamic regulatory network explains  
812 ParaHox gene control of gut patterning in the sea urchin. *Development*, 141,  
813 2462-72.
- 814 ANNUNZIATA, R., PERILLO, M., ANDRIKOU, C., COLE, A. G., MARTINEZ, P. &  
815 ARNONE, M. I. 2014. Pattern and process during sea urchin gut morphogenesis:  
816 the regulatory landscape. *Genesis*, 52, 251-68.
- 817 ARENDT, D. 2008. The evolution of cell types in animals: emerging principles from  
818 molecular studies. *Nat Rev Genet*, 9, 868-82.
- 819 ARKHIPOVA, V., WENDIK, B., DEVOS, N., EK, O., PEERS, B. & MEYER, D. 2012.  
820 Characterization and regulation of the hb9/mnx1 beta-cell progenitor specific  
821 enhancer in zebrafish. *Dev Biol*, 365, 290-302.
- 822 ARNONE, M. I., ANDRIKOU, C. & ANNUNZIATA, R. 2016. Echinoderm systems for  
823 gene regulatory studies in evolution and development. *Curr Opin Genet Dev*, 39,  
824 129-137.
- 825 ARNTFIELD, M. E. & VAN DER KOOY, D. 2011. beta-Cell evolution: How the pancreas  
826 borrowed from the brain: The shared toolbox of genes expressed by neural and  
827 pancreatic endocrine cells may reflect their evolutionary relationship. *Bioessays*,  
828 33, 582-7.
- 829 BEN-TABOU DE-LEON, S., SU, Y. H., LIN, K. T., LI, E. & DAVIDSON, E. H. 2013.  
830 Gene regulatory control in the sea urchin aboral ectoderm: spatial initiation,  
831 signaling inputs, and cell fate lockdown. *Dev Biol*, 374, 245-54.
- 832 BERGER, C. & ZDZIEBLO, D. 2020. Glucose transporters in pancreatic islets. *Pflugers*  
833 *Arch*, 472, 1249-1272.
- 834 BISGROVE, B. W. & BURKE, R. D. 1987. Development of the Nervous-System of the  
835 Pluteus Larva of Strongylocentrotus-Droebachiensis. *Cell and Tissue Research*,  
836 248, 335-343.
- 837 BUCKLE, A., NOZAWA, R. S., KLEINJAN, D. A. & GILBERT, N. 2018. Functional  
838 characteristics of novel pancreatic Pax6 regulatory elements. *Hum Mol Genet*,  
839 27, 3434-3448.
- 840 BURKE, R. D., ANGERER, L. M., ELPHICK, M. R., HUMPHREY, G. W., YAGUCHI, S.,  
841 KIYAMA, T., LIANG, S., MU, X., AGCA, C., KLEIN, W. H., BRANDHORST, B. P.,  
842 ROWE, M., WILSON, K., CHURCHER, A. M., TAYLOR, J. S., CHEN, N.,  
843 MURRAY, G., WANG, D., MELLOTT, D., OLINSKI, R., HALLBOOK, F. &  
844 THORNDYKE, M. C. 2006a. A genomic view of the sea urchin nervous system.  
845 *Dev Biol*, 300, 434-60.
- 846 BURKE, R. D., MOLLER, D. J., KRUPKE, O. A. & TAYLOR, V. J. 2014. Sea urchin  
847 neural development and the metazoan paradigm of neurogenesis. *Genesis*, 52,  
848 208-21.

Paganos *et al.*,

- 849 BURKE, R. D., OSBORNE, L., WANG, D., MURABE, N., YAGUCHI, S. & NAKAJIMA,  
850 Y. 2006b. Neuron-specific expression of a synaptotagmin gene in the sea urchin  
851 *Strongylocentrotus purpuratus*. *J Comp Neurol*, 496, 244-51.
- 852 BUTLER, A., HOFFMAN, P., SMIBERT, P., PAPALEXI, E. & SATIJA, R. 2018.  
853 Integrating single-cell transcriptomic data across different conditions,  
854 technologies, and species. *Nat Biotechnol*, 36, 411-420.
- 855 CALESTANI, C. & ROGERS, D. J. 2010. Cis-regulatory analysis of the sea urchin  
856 pigment cell gene polyketide synthase. *Dev Biol*, 340, 249-55.
- 857 CAMERON, R. A. & DAVIDSON, E. H. 1991. Cell type specification during sea urchin  
858 development. *Trends Genet*, 7, 212-8.
- 859 CAMERON, R. A., HOUGH-EVANS, B. R., BRITTEN, R. J. & DAVIDSON, E. H. 1987.  
860 Lineage and fate of each blastomere of the eight-cell sea urchin embryo. *Genes*  
861 *Dev*, 1, 75-85.
- 862 CAO, C., LEMAIRE, L. A., WANG, W., YOON, P. H., CHOI, Y. A., PARSONS, L. R.,  
863 MATESE, J. C., WANG, W., LEVINE, M. & CHEN, K. 2019. Comprehensive  
864 single-cell transcriptome lineages of a proto-vertebrate. *Nature*, 571, 349-354.
- 865 CARY, G. A., MCCAULEY, B. S., ZUEVA, O., PATTINATO, J., LONGABAUGH, W. &  
866 HINMAN, V. F. 2020. Systematic comparison of sea urchin and sea star  
867 developmental gene regulatory networks explains how novelty is incorporated in  
868 early development. *Nat Commun*, 11, 6235.
- 869 CHESTNUT, B., CASIE CHETTY, S., KOENIG, A. L. & SUMANAS, S. 2020. Single-cell  
870 transcriptomic analysis identifies the conversion of zebrafish *Etv2*-deficient  
871 vascular progenitors into skeletal muscle. *Nat Commun*, 11, 2796.
- 872 CHO, B., YOON, S. H., LEE, D., KORANTENG, F., TATTIKOTA, S. G., CHA, N., SHIN,  
873 M., DO, H., HU, Y., OH, S. Y., LEE, D., VIPIN MENON, A., MOON, S. J.,  
874 PERRIMON, N., NAM, J. W. & SHIM, J. 2020. Single-cell transcriptome maps of  
875 myeloid blood cell lineages in *Drosophila*. *Nat Commun*, 11, 4483.
- 876 COLE, A. G. & ARNONE, M. I. 2009. Fluorescent in situ hybridization reveals multiple  
877 expression domains for *SpBrn1/2/4* and identifies a unique ectodermal cell type  
878 that co-expresses the *ParaHox* gene *SpLox*. *Gene Expr Patterns*, 9, 324-8.
- 879 COLE, A. G., RIZZO, F., MARTINEZ, P., FERNANDEZ-SERRA, M. & ARNONE, M. I.  
880 2009. Two *ParaHox* genes, *SpLox* and *SpCdx*, interact to partition the posterior  
881 endoderm in the formation of a functional gut. *Development*, 136, 541-9.
- 882 DAVIDSON, E. H., CAMERON, R. A. & RANSICK, A. 1998. Specification of cell fate in  
883 the sea urchin embryo: summary and some proposed mechanisms.  
884 *Development*, 125, 3269-90.
- 885 DAVIDSON, E. H. & ERWIN, D. H. 2006. Gene regulatory networks and the evolution of  
886 animal body plans. *Science*, 311, 796-800.
- 887 DAVIDSON, E. H., MCCLAY, D. R. & HOOD, L. 2003. Regulatory gene networks and  
888 the properties of the developmental process. *Proc Natl Acad Sci U S A*, 100,  
889 1475-80.
- 890 DAVIE, K., JANSSENS, J., KOLDERE, D., DE WAEGENEER, M., PECH, U., KREFT,  
891 L., AIBAR, S., MAKHZAMI, S., CHRISTIAENS, V., BRAVO GONZALEZ-BLAS,  
892 C., POOVATHINGAL, S., HULSELMANS, G., SPANIER, K. I., MOERMAN, T.,  
893 VANSPAUWEN, B., GEURS, S., VOET, T., LAMMERTYN, J., THIENPONT, B.,  
894 LIU, S., KONSTANTINIDES, N., FIERS, M., VERSTREKEN, P. & AERTS, S.

Paganos *et al.*,

- 895           2018. A Single-Cell Transcriptome Atlas of the Aging *Drosophila* Brain. *Cell*, 174,  
896           982-998 e20.
- 897 DE LA POMPA, J. L., WAKEHAM, A., CORREIA, K. M., SAMPER, E., BROWN, S.,  
898           AGUILERA, R. J., NAKANO, T., HONJO, T., MAK, T. W., ROSSANT, J. &  
899           CONLON, R. A. 1997. Conservation of the Notch signalling pathway in  
900           mammalian neurogenesis. *Development*, 124, 1139-48.
- 901 DULOQUIN, L., LHOMOND, G. & GACHE, C. 2007. Localized VEGF signaling from  
902           ectoderm to mesenchyme cells controls morphogenesis of the sea urchin embryo  
903           skeleton. *Development*, 134, 2293-302.
- 904 ESAULOVA, E., CANTONI, C., SHCHUKINA, I., ZAITSEV, K., BUCELLI, R. C., WU, G.  
905           F., ARTYOMOV, M. N., CROSS, A. H. & EDELSON, B. T. 2020. Single-cell  
906           RNA-seq analysis of human CSF microglia and myeloid cells in  
907           neuroinflammation. *Neurol Neuroimmunol Neuroinflamm*, 7.
- 908 ETTENSOHN, C. A. 2020. The gene regulatory control of sea urchin gastrulation. *Mech*  
909           *Dev*, 103599.
- 910 FINN, R. D., BATEMAN, A., CLEMENTS, J., COGILL, P., EBERHARDT, R. Y.,  
911           EDDY, S. R., HEGER, A., HETHERINGTON, K., HOLM, L., MISTRY, J.,  
912           SONNHAMMER, E. L., TATE, J. & PUNTA, M. 2014. Pfam: the protein families  
913           database. *Nucleic Acids Res*, 42, D222-30.
- 914 FU, X., HE, F., LI, Y., SHAHVERANOV, A. & HUTCHINS, A. P. 2017. Genomic and  
915           molecular control of cell type and cell type conversions. *Cell Regen*, 6, 1-7.
- 916 GARNER, S., ZYSK, I., BYRNE, G., KRAMER, M., MOLLER, D., TAYLOR, V. &  
917           BURKE, R. D. 2016. Neurogenesis in sea urchin embryos and the diversity of  
918           deuterostome neurogenic mechanisms. *Development*, 143, 286-97.
- 919 GONOI, T., MIZUNO, N., INAGAKI, N., KUROMI, H., SEINO, Y., MIYAZAKI, J. &  
920           SEINO, S. 1994. Functional neuronal ionotropic glutamate receptors are  
921           expressed in the non-neuronal cell line MIN6. *J Biol Chem*, 269, 16989-92.
- 922 HARKEY, M. A., WHITELEY, H. R. & WHITELEY, A. H. 1992. Differential expression of  
923           the msp130 gene among skeletal lineage cells in the sea urchin embryo: a three  
924           dimensional in situ hybridization analysis. *Mech Dev*, 37, 173-84.
- 925 HARLOW, P. & NEMER, M. 1987. Coordinate and selective beta-tubulin gene  
926           expression associated with cilium formation in sea urchin embryos. *Genes Dev*,  
927           1, 1293-304.
- 928 HART, A. W., MELLA, S., MENDRYCHOWSKI, J., VAN HEYNINGEN, V. & KLEINJAN,  
929           D. A. 2013. The developmental regulator Pax6 is essential for maintenance of  
930           islet cell function in the adult mouse pancreas. *PLoS One*, 8, e54173.
- 931 HO, E. C., BUCKLEY, K. M., SCHRANKEL, C. S., SCHUH, N. W., HIBINO, T., SOLEK,  
932           C. M., BAE, K., WANG, G. & RAST, J. P. 2017. Perturbation of gut bacteria  
933           induces a coordinated cellular immune response in the purple sea urchin larva.  
934           *Immunol Cell Biol*, 95, 647.
- 935 HOWARD-ASHBY, M., MATERNA, S. C., BROWN, C. T., CHEN, L., CAMERON, R. A.  
936           & DAVIDSON, E. H. 2006. Identification and characterization of homeobox  
937           transcription factor genes in *Strongylocentrotus purpuratus*, and their expression  
938           in embryonic development. *Dev Biol*, 300, 74-89.
- 939 HU, Y., SCHMITT-ENGEL, C., SCHWIRZ, J., STROEHLEIN, N., RICHTER, T.,  
940           MAJUMDAR, U. & BUCHER, G. 2018. A morphological novelty evolved by co-

Paganos *et al.*,

- 941 option of a reduced gene regulatory network and gene recruitment in a beetle.  
942 *Proc Biol Sci*, 285.
- 943 HUI, H. & PERFETTI, R. 2002. Pancreas duodenum homeobox-1 regulates pancreas  
944 development during embryogenesis and islet cell function in adulthood. *Eur J*  
945 *Endocrinol*, 146, 129-41.
- 946 HUSSAIN, M. A., MILLER, C. P. & HABENER, J. F. 2002. Brn-4 transcription factor  
947 expression targeted to the early developing mouse pancreas induces ectopic  
948 glucagon gene expression in insulin-producing beta cells. *J Biol Chem*, 277,  
949 16028-32.
- 950 ISHIBASHI, M., ANG, S. L., SHIOTA, K., NAKANISHI, S., KAGEYAMA, R. &  
951 GUILLEMOT, F. 1995. Targeted disruption of mammalian hairy and Enhancer of  
952 split homolog-1 (HES-1) leads to up-regulation of neural helix-loop-helix factors,  
953 premature neurogenesis, and severe neural tube defects. *Genes Dev*, 9, 3136-  
954 48.
- 955 ISO, T., KEDES, L. & HAMAMORI, Y. 2003. HES and HERP families: multiple effectors  
956 of the Notch signaling pathway. *J Cell Physiol*, 194, 237-55.
- 957 ITURRIZA, F. C. & THIBAUT, J. 1993. Immunohistochemical investigation of tyrosine-  
958 hydroxylase in the islets of Langerhans of adult mice, rats and guinea pigs.  
959 *Neuroendocrinology*, 57, 476-80.
- 960 JULIANO, C., SWARTZ, S. Z. & WESSEL, G. 2014. Isolating specific embryonic cells of  
961 the sea urchin by FACS. *Methods Mol Biol*, 1128, 187-96.
- 962 JULIANO, C. E., VORONINA, E., STACK, C., ALDRICH, M., CAMERON, A. R. &  
963 WESSEL, G. M. 2006. Germ line determinants are not localized early in sea  
964 urchin development, but do accumulate in the small micromere lineage. *Dev Biol*,  
965 300, 406-15.
- 966 JULIANO, C. E., YAJIMA, M. & WESSEL, G. M. 2010. Nanos functions to maintain the  
967 fate of the small micromere lineage in the sea urchin embryo. *Dev Biol*, 337, 220-  
968 32.
- 969 JUNG, M., WELLS, D., RUSCH, J., AHMAD, S., MARCHINI, J., MYERS, S. R. &  
970 CONRAD, D. F. 2019. Unified single-cell analysis of testis gene regulation and  
971 pathology in five mouse strains. *Elife*, 8.
- 972 KANETO, H., MIYATSUKA, T., KAWAMORI, D., YAMAMOTO, K., KATO, K.,  
973 SHIRAIWA, T., KATAKAMI, N., YAMASAKI, Y., MATSUHISA, M. & MATSUOKA,  
974 T. A. 2008. PDX-1 and MafA play a crucial role in pancreatic beta-cell  
975 differentiation and maintenance of mature beta-cell function. *Endocr J*, 55, 235-  
976 52.
- 977 KANETO, H., MIYATSUKA, T., SHIRAIWA, T., YAMAMOTO, K., KATO, K., FUJITANI,  
978 Y. & MATSUOKA, T. A. 2007. Crucial role of PDX-1 in pancreas development,  
979 beta-cell differentiation, and induction of surrogate beta-cells. *Curr Med Chem*,  
980 14, 1745-52.
- 981 KATOW, H., SUYEMITSU, T., OOKA, S., YAGUCHI, J., JIN-NAI, T., KUWAHARA, I.,  
982 KATOW, T., YAGUCHI, S. & ABE, H. 2010. Development of a dopaminergic  
983 system in sea urchin embryos and larvae. *J Exp Biol*, 213, 2808-19.
- 984 KLEIN, A. M., MAZUTIS, L., AKARTUNA, I., TALLAPRAGADA, N., VERES, A., LI, V.,  
985 PESHKIN, L., WEITZ, D. A. & KIRSCHNER, M. W. 2015. Droplet barcoding for  
986 single-cell transcriptomics applied to embryonic stem cells. *Cell*, 161, 1187-1201.

Paganos *et al.*,

- 987 KROUK, G., LINGEMAN, J., COLON, A. M., CORUZZI, G. & SHASHA, D. 2013. Gene  
988 regulatory networks in plants: learning causality from time and perturbation.  
989 *Genome Biology*, 14.
- 990 KUDTARKAR, P. & CAMERON, R. A. 2017. Echinobase: an expanding resource for  
991 echinoderm genomic information. *Database (Oxford)*, 2017.
- 992 LI, H., ARBER, S., JESSELL, T. M. & EDLUND, H. 1999. Selective agenesis of the  
993 dorsal pancreas in mice lacking homeobox gene Hlxb9. *Nat Genet*, 23, 67-70.
- 994 LONGABAUGH, W. J. 2012. BioTapestry: a tool to visualize the dynamic properties of  
995 gene regulatory networks. *Methods Mol Biol*, 786, 359-94.
- 996 LUO, Y. J. & SU, Y. H. 2012. Opposing nodal and BMP signals regulate left-right  
997 asymmetry in the sea urchin larva. *PLoS Biol*, 10, e1001402.
- 998 LYONS, D. C., KALTENBACH, S. L. & MCCLAY, D. R. 2012. Morphogenesis in sea  
999 urchin embryos: linking cellular events to gene regulatory network states. *Wiley*  
1000 *Interdiscip Rev Dev Biol*, 1, 231-52.
- 1001 MAECHLER, P. & WOLLHEIM, C. B. 1999. Mitochondrial glutamate acts as a  
1002 messenger in glucose-induced insulin exocytosis. *Nature*, 402, 685-9.
- 1003 MARTIK, M. L. & MCCLAY, D. R. 2015. Deployment of a retinal determination gene  
1004 network drives directed cell migration in the sea urchin embryo. *Elife*, 4.
- 1005 MASSRI, A. J., GREENSTREET, L., AFANASSIEV, A., ESCOBAR, A. B., WRAY, G.  
1006 M., SCHIEBINGER, G. & MCCLAY, D. R. 2020. Developmental Single-cell  
1007 transcriptomics in the Lytechinus variegatus Sea Urchin Embryo. *bioRxiv*,  
1008 2020.11.12.380675.
- 1009 MATERNA, S. C., HOWARD-ASHBY, M., GRAY, R. F. & DAVIDSON, E. H. 2006. The  
1010 C2H2 zinc finger genes of Strongylocentrotus purpuratus and their expression in  
1011 embryonic development. *Dev Biol*, 300, 108-20.
- 1012 MATERNA, S. C., RANSICK, A., LI, E. & DAVIDSON, E. H. 2013. Diversification of oral  
1013 and aboral mesodermal regulatory states in pregastrular sea urchin embryos.  
1014 *Dev Biol*, 375, 92-104.
- 1015 MCCLAY, D. R. 1986. Embryo dissociation, cell isolation, and cell reassociation.  
1016 *Methods Cell Biol*, 27, 309-23.
- 1017 MCCLAY, D. R. 2004. Methods for embryo dissociation and analysis of cell adhesion.  
1018 *Methods Cell Biol*, 74, 311-29.
- 1019 MCCLAY, D. R. 2011. Evolutionary crossroads in developmental biology: sea urchins.  
1020 *Development*, 138, 2639-48.
- 1021 MCCLAY, D. R., MIRANDA, E. & FEINBERG, S. L. 2018. Neurogenesis in the sea  
1022 urchin embryo is initiated uniquely in three domains. *Development*, 145.
- 1023 MCCLAY, D. R., WARNER, J., MARTIK, M., MIRANDA, E. & SLOTA, L. 2020.  
1024 Gastrulation in the sea urchin. *Curr Top Dev Biol*, 136, 195-218.
- 1025 MCQUEEN, E. & REBEIZ, M. 2020. On the specificity of gene regulatory networks: How  
1026 does network co-option affect subsequent evolution? *Curr Top Dev Biol*, 139,  
1027 375-405.
- 1028 MITCHELL, R. K., NGUYEN-TU, M. S., CHABOSSEAU, P., CALLINGHAM, R. M.,  
1029 PULLEN, T. J., CHEUNG, R., LECLERC, I., HODSON, D. J. & RUTTER, G. A.  
1030 2017. The transcription factor Pax6 is required for pancreatic beta cell identity,  
1031 glucose-regulated ATP synthesis, and Ca(2+) dynamics in adult mice. *J Biol*  
1032 *Chem*, 292, 8892-8906.

Paganos *et al.*,

- 1033 MIZUSAWA, N., HASEGAWA, T., OHIGASHI, I., TANAKA-KOSUGI, C., HARADA, N.,  
1034 ITAKURA, M. & YOSHIMOTO, K. 2004. Differentiation phenotypes of pancreatic  
1035 islet beta- and alpha-cells are closely related with homeotic genes and a group of  
1036 differentially expressed genes. *Gene*, 331, 53-63.
- 1037 MONTEIRO, A. 2012. Gene regulatory networks reused to build novel traits: co-option  
1038 of an eye-related gene regulatory network in eye-like organs and red wing  
1039 patches on insect wings is suggested by optix expression. *Bioessays*, 34, 181-6.
- 1040 MORGULIS, M., GILDOR, T., ROOPIN, M., SHER, N., MALIK, A., LALZAR, M., DINES,  
1041 M., BEN-TABOU DE-LEON, S., KHALAILY, L. & BEN-TABOU DE-LEON, S.  
1042 2019. Possible cooption of a VEGF-driven tubulogenesis program for  
1043 biomineralization in echinoderms. *Proc Natl Acad Sci U S A*, 116, 12353-12362.
- 1044 NAVALE, A. M. & PARANJAPE, A. N. 2016. Glucose transporters: physiological and  
1045 pathological roles. *Biophys Rev*, 8, 5-9.
- 1046 NESTOROWA, S., HAMEY, F. K., PIJUAN SALA, B., DIAMANTI, E., SHEPHERD, M.,  
1047 LAURENTI, E., WILSON, N. K., KENT, D. G. & GOTTGENS, B. 2016. A single-  
1048 cell resolution map of mouse hematopoietic stem and progenitor cell  
1049 differentiation. *Blood*, 128, e20-31.
- 1050 OKAZAKI, K. 1965. Skeleton formation of sea urchin larvae. V. Continuous observation  
1051 of the process of matrix formation. *Exp Cell Res*, 40, 585-96.
- 1052 PEHRSON, J. R. & COHEN, L. H. 1986. The fate of the small micromeres in sea urchin  
1053 development. *Dev Biol*, 113, 522-6.
- 1054 PERILLO, M. & ARNONE, M. I. 2014. Characterization of insulin-like peptides (ILPs) in  
1055 the sea urchin *Strongylocentrotus purpuratus*: insights on the evolution of the  
1056 insulin family. *Gen Comp Endocrinol*, 205, 68-79.
- 1057 PERILLO, M., OULHEN, N., FOSTER, S., SPURRELL, M., CALESTANI, C. &  
1058 WESSEL, G. 2020. Regulation of dynamic pigment cell states at single-cell  
1059 resolution. *Elife*, 9.
- 1060 PERILLO, M., PAGANOS, P., MATTIELLO, T., COCURULLO, M., OLIVERI, P. &  
1061 ARNONE, M. I. 2018. New Neuronal Subtypes With a "Pre-Pancreatic" Signature  
1062 in the Sea Urchin *Strongylocentrotus purpuratus*. *Front Endocrinol (Lausanne)*, 9,  
1063 650.
- 1064 PERILLO, M., PAGANOS, P., SPURRELL, M., ARNONE, M. I. & WESSEL, G. M. 2021.  
1065 Methodology for Whole Mount and Fluorescent RNA In Situ Hybridization in  
1066 Echinoderms: Single, Double, and Beyond. *Methods Mol Biol*, 2219, 195-216.
- 1067 PERILLO, M., WANG, Y. J., LEACH, S. D. & ARNONE, M. I. 2016. A pancreatic  
1068 exocrine-like cell regulatory circuit operating in the upper stomach of the sea  
1069 urchin *Strongylocentrotus purpuratus* larva. *BMC Evol Biol*, 16, 117.
- 1070 PREGER-BEN NOON, E. & FRANKEL, N. 2015. Evolving Genital Structures: A Deep  
1071 Look at Network Co-option. *Dev Cell*, 34, 485-6.
- 1072 QI, F., QIAN, S., ZHANG, S. & ZHANG, Z. 2020. Single cell RNA sequencing of 13  
1073 human tissues identify cell types and receptors of human coronaviruses.  
1074 *Biochem Biophys Res Commun*, 526, 135-140.
- 1075 RAFIQ, K., CHEERS, M. S. & ETTENSOHN, C. A. 2012. The genomic regulatory  
1076 control of skeletal morphogenesis in the sea urchin. *Development*, 139, 579-90.
- 1077 RAST, J. P., SMITH, L. C., LOZA-COLL, M., HIBINO, T. & LITMAN, G. W. 2006.  
1078 Genomic insights into the immune system of the sea urchin. *Science*, 314, 952-6.

Paganos *et al.*,

- 1079 RIZZO, F., FERNANDEZ-SERRA, M., SQUARZONI, P., ARCHIMANDRITIS, A. &  
1080 ARNONE, M. I. 2006. Identification and developmental expression of the ets  
1081 gene family in the sea urchin (*Strongylocentrotus purpuratus*). *Dev Biol*, 300, 35-  
1082 48.
- 1083 RODRIGUEZ-DIAZ, R., DANDO, R., JACQUES-SILVA, M. C., FACHADO, A., MOLINA,  
1084 J., ABDULREDA, M. H., RICORDI, C., ROPER, S. D., BERGGREN, P. O. &  
1085 CAICEDO, A. 2011. Alpha cells secrete acetylcholine as a non-neuronal  
1086 paracrine signal priming beta cell function in humans. *Nat Med*, 17, 888-92.
- 1087 SEA URCHIN GENOME SEQUENCING, C., SODERGREN, E., WEINSTOCK, G. M.,  
1088 DAVIDSON, E. H., CAMERON, R. A., GIBBS, R. A., ANGERER, R. C.,  
1089 ANGERER, L. M., ARNONE, M. I., BURGESS, D. R., BURKE, R. D., COFFMAN,  
1090 J. A., DEAN, M., ELPHICK, M. R., ETTENSOHN, C. A., FOLTZ, K. R.,  
1091 HAMDOUN, A., HYNES, R. O., KLEIN, W. H., MARZLUFF, W., MCCLAY, D. R.,  
1092 MORRIS, R. L., MUSHEGIAN, A., RAST, J. P., SMITH, L. C., THORNDYKE, M.  
1093 C., VACQUIER, V. D., WESSEL, G. M., WRAY, G., ZHANG, L., ELSIK, C. G.,  
1094 ERMOLAEVA, O., HLAVINA, W., HOFMANN, G., KITTS, P., LANDRUM, M. J.,  
1095 MACKEY, A. J., MAGLOTT, D., PANOPOULOU, G., POUSTKA, A. J., PRUITT,  
1096 K., SAPOJNIKOV, V., SONG, X., SOUVOROV, A., SOLOVYEV, V., WEI, Z.,  
1097 WHITTAKER, C. A., WORLEY, K., DURBIN, K. J., SHEN, Y., FEDRIGO, O.,  
1098 GARFIELD, D., HAYGOOD, R., PRIMUS, A., SATIJA, R., SEVERSON, T.,  
1099 GONZALEZ-GARAY, M. L., JACKSON, A. R., MILOSAVLJEVIC, A., TONG, M.,  
1100 KILLIAN, C. E., LIVINGSTON, B. T., WILT, F. H., ADAMS, N., BELLE, R.,  
1101 CARBONNEAU, S., CHEUNG, R., CORMIER, P., COSSON, B., CROCE, J.,  
1102 FERNANDEZ-GUERRA, A., GENEVIERE, A. M., GOEL, M., KELKAR, H.,  
1103 MORALES, J., MULNER-LORILLON, O., ROBERTSON, A. J., GOLDSTONE, J.  
1104 V., COLE, B., EPEL, D., GOLD, B., HAHN, M. E., HOWARD-ASHBY, M.,  
1105 SCALLY, M., STEGEMAN, J. J., ALLGOOD, E. L., COOL, J., JUDKINS, K. M.,  
1106 MCCAFFERTY, S. S., MUSANTE, A. M., OBAR, R. A., RAWSON, A. P.,  
1107 ROSSETTI, B. J., GIBBONS, I. R., HOFFMAN, M. P., LEONE, A., ISTRAIL, S.,  
1108 MATERNA, S. C., SAMANTA, M. P., STOLC, V., et al. 2006. The genome of the  
1109 sea urchin *Strongylocentrotus purpuratus*. *Science*, 314, 941-52.
- 1110 SEBE-PEDROS, A., SAUDEMONT, B., CHOMSKY, E., PLESSIER, F., MAILHE, M. P.,  
1111 RENNO, J., LOE-MIE, Y., LIFSHITZ, A., MUKAMEL, Z., SCHMUTZ, S.,  
1112 NOVAULT, S., STEINMETZ, P. R. H., SPITZ, F., TANAY, A. & MARLOW, H.  
1113 2018. Cnidarian Cell Type Diversity and Regulation Revealed by Whole-  
1114 Organism Single-Cell RNA-Seq. *Cell*, 173, 1520-1534 e20.
- 1115 SEVERO, M. S., LANDRY, J. J. M., LINDQUIST, R. L., GOOSMANN, C., BRINKMANN,  
1116 V., COLLIER, P., HAUSER, A. E., BENES, V., HENRIKSSON, J., TEICHMANN,  
1117 S. A. & LEVASHINA, E. A. 2018. Unbiased classification of mosquito blood cells  
1118 by single-cell genomics and high-content imaging. *Proc Natl Acad Sci U S A*,  
1119 115, E7568-E7577.
- 1120 SHARMA, S., WANG, W. & STOLFI, A. 2019. Single-cell transcriptome profiling of the  
1121 *Ciona* larval brain. *Dev Biol*, 448, 226-236.
- 1122 SHEKHAR, K. & MENON, V. 2019. Identification of Cell Types from Single-Cell  
1123 Transcriptomic Data. *Methods Mol Biol*, 1935, 45-77.



Paganos *et al.*,

- 1124 SLADITSCHKEK, H. L., FIUZA, U. M., PAVLINIC, D., BENES, V., HUFNAGEL, L. &  
1125 NEVEU, P. A. 2020. MorphoSeq: Full Single-Cell Transcriptome Dynamics Up to  
1126 Gastrulation in a Chordate. *Cell*, 181, 922-935 e21.
- 1127 SLOTA, L. A. & MCCLAY, D. R. 2018. Identification of neural transcription factors  
1128 required for the differentiation of three neuronal subtypes in the sea urchin  
1129 embryo. *Dev Biol*, 435, 138-149.
- 1130 SLOTA, L. A., MIRANDA, E., PESKIN, B. & MCCLAY, D. R. 2020. Developmental origin  
1131 of peripheral ciliary band neurons in the sea urchin embryo. *Dev Biol*, 459, 72-78.
- 1132 SMITH, M. M., CRUZ SMITH, L., CAMERON, R. A. & URRY, L. A. 2008. The larval  
1133 stages of the sea urchin, *Strongylocentrotus purpuratus*. *J Morphol*, 269, 713-33.
- 1134 SOLIMAN, S. 1983. Pharmacological control of ciliary activity in the young sea urchin  
1135 larva. Effects of monoaminergic agents. *Comp Biochem Physiol C Comp*  
1136 *Pharmacol Toxicol*, 76, 181-91.
- 1137 STRATHMANN, M. F. 1987. *Reproduction and development of marine invertebrates of*  
1138 *the northern Pacific coast : data and methods for the study of eggs, embryos,*  
1139 *and larvae*, Seattle, University of Washington Press.
- 1140 STUART, T., BUTLER, A., HOFFMAN, P., HAFEMEISTER, C., PAPALEXI, E.,  
1141 MAUCK, W. M., 3RD, HAO, Y., STOECKIUS, M., SMIBERT, P. & SATIJA, R.  
1142 2019. Comprehensive Integration of Single-Cell Data. *Cell*, 177, 1888-1902 e21.
- 1143 SUN, Z. & ETTENSOHN, C. A. 2014. Signal-dependent regulation of the sea urchin  
1144 skeletogenic gene regulatory network. *Gene Expr Patterns*, 16, 93-103.
- 1145 SUN, Z. & ETTENSOHN, C. A. 2017. TGF-beta sensu stricto signaling regulates  
1146 skeletal morphogenesis in the sea urchin embryo. *Dev Biol*, 421, 149-160.
- 1147 TANG, F., BARBACIORU, C., WANG, Y., NORDMAN, E., LEE, C., XU, N., WANG, X.,  
1148 BODEAU, J., TUCH, B. B., SIDDIQUI, A., LAO, K. & SURANI, M. A. 2009.  
1149 mRNA-Seq whole-transcriptome analysis of a single cell. *Nat Methods*, 6, 377-  
1150 82.
- 1151 TEITELMAN, G., ALPERT, S., POLAK, J. M., MARTINEZ, A. & HANAHAN, D. 1993.  
1152 Precursor cells of mouse endocrine pancreas coexpress insulin, glucagon and  
1153 the neuronal proteins tyrosine hydroxylase and neuropeptide Y, but not  
1154 pancreatic polypeptide. *Development*, 118, 1031-9.
- 1155 TRAPNELL, C., WILLIAMS, B. A., PERTEA, G., MORTAZAVI, A., KWAN, G., VAN  
1156 BAREN, M. J., SALZBERG, S. L., WOLD, B. J. & PACHTER, L. 2010. Transcript  
1157 assembly and quantification by RNA-Seq reveals unannotated transcripts and  
1158 isoform switching during cell differentiation. *Nat Biotechnol*, 28, 511-5.
- 1159 TRITSCHLER, S., THEIS, F. J., LICKERT, H. & BOTTCHEK, A. 2017. Systematic  
1160 single-cell analysis provides new insights into heterogeneity and plasticity of the  
1161 pancreas. *Mol Metab*, 6, 974-990.
- 1162 TU, Q., BROWN, C. T., DAVIDSON, E. H. & OLIVERI, P. 2006. Sea urchin Forkhead  
1163 gene family: phylogeny and embryonic expression. *Dev Biol*, 300, 49-62.
- 1164 TU, Q., CAMERON, R. A. & DAVIDSON, E. H. 2014. Quantitative developmental  
1165 transcriptomes of the sea urchin *Strongylocentrotus purpuratus*. *Dev Biol*, 385,  
1166 160-7.
- 1167 WAGNER, D. E., WEINREB, C., COLLINS, Z. M., BRIGGS, J. A., MEGASON, S. G. &  
1168 KLEIN, A. M. 2018. Single-cell mapping of gene expression landscapes and  
1169 lineage in the zebrafish embryo. *Science*, 360, 981-987.

Paganos *et al.*,

- 1170 WEI, Z., ANGERER, L. M. & ANGERER, R. C. 2016. Neurogenic gene regulatory  
1171 pathways in the sea urchin embryo. *Development*, 143, 298-305.
- 1172 WEI, Z., ANGERER, R. C. & ANGERER, L. M. 2011. Direct development of neurons  
1173 within foregut endoderm of sea urchin embryos. *Proc Natl Acad Sci U S A*, 108,  
1174 9143-7.
- 1175 WEI, Z., RANGE, R., ANGERER, R. & ANGERER, L. 2012. Axial patterning interactions  
1176 in the sea urchin embryo: suppression of nodal by Wnt1 signaling. *Development*,  
1177 139, 1662-9.
- 1178 WEI, Z., YAGUCHI, J., YAGUCHI, S., ANGERER, R. C. & ANGERER, L. M. 2009. The  
1179 sea urchin animal pole domain is a Six3-dependent neurogenic patterning center.  
1180 *Development*, 136, 1179-89.
- 1181 WESSEL, G. M. & MCCLAY, D. R. 1987. Gastrulation in the sea urchin embryo requires  
1182 the deposition of crosslinked collagen within the extracellular matrix. *Dev Biol*,  
1183 121, 149-65.
- 1184 WOOD, N.J., T. M., WARD, E.T.M., ROWE, M.L., PERILLO, M., ARNONE, M.I. ,  
1185 ELPHICK, M.R. & OLIVERI, P. 2018. Neuropeptidergic systems in pluteus larvae  
1186 of the sea urchin *Strongylocentrotus purpuratus*: neurochemical complexity in a  
1187 “simple” nervous system. *Frontiers in Endocrinology*.
- 1188 XIMERAKIS, M., LIPNICK, S. L., INNES, B. T., SIMMONS, S. K., ADICONIS, X.,  
1189 DIONNE, D., MAYWEATHER, B. A., NGUYEN, L., NIZIOLEK, Z., OZEK, C.,  
1190 BUTTY, V. L., ISSERLIN, R., BUCHANAN, S. M., LEVINE, S. S., REGEV, A.,  
1191 BADER, G. D., LEVIN, J. Z. & RUBIN, L. L. 2019. Single-cell transcriptomic  
1192 profiling of the aging mouse brain. *Nat Neurosci*, 22, 1696-1708.
- 1193 YAGUCHI, J., TAKEDA, N., INABA, K. & YAGUCHI, S. 2016. Cooperative Wnt-Nodal  
1194 Signals Regulate the Patterning of Anterior Neuroectoderm. *PLoS Genet*, 12,  
1195 e1006001.
- 1196 YAGUCHI, S., YAGUCHI, J. & TANAKA, H. 2017. Troponin-I is present as an essential  
1197 component of muscles in echinoderm larvae. *Sci Rep*, 7, 43563.
- 1198 YU, Z., LIAO, J., CHEN, Y., ZOU, C., ZHANG, H., CHENG, J., LIU, D., LI, T., ZHANG,  
1199 Q., LI, J., YANG, X., YE, Y., HUANG, Z., LONG, X., YANG, R. & MO, Z. 2019.  
1200 Single-Cell Transcriptomic Map of the Human and Mouse Bladders. *J Am Soc*  
1201 *Nephrol*, 30, 2159-2176.
- 1202 YUH, C. H., LI, X., DAVIDSON, E. H. & KLEIN, W. H. 2001. Correct Expression of  
1203 *spec2a* in the sea urchin embryo requires both Otx and other cis-regulatory  
1204 elements. *Dev Biol*, 232, 424-38.
- 1205 ZARET, K. S. & GROMPE, M. 2008. Generation and regeneration of cells of the liver  
1206 and pancreas. *Science*, 322, 1490-4.
- 1207 ZHAO, J., ZHANG, S., LIU, Y., HE, X., QU, M., XU, G., WANG, H., HUANG, M., PAN,  
1208 J., LIU, Z., LI, Z., LIU, L. & ZHANG, Z. 2020. Single-cell RNA sequencing reveals  
1209 the heterogeneity of liver-resident immune cells in human. *Cell Discov*, 6, 22.
- 1210
